# Supplementary material
Source: PubMed Central journal article supplement (PMC7294733)

|                                                                                                                      |                                                                                                                             |                                                                                                                       |                                                                                                                        |
|----------------------------------------------------------------------------------------------------------------------|-----------------------------------------------------------------------------------------------------------------------------|-----------------------------------------------------------------------------------------------------------------------|------------------------------------------------------------------------------------------------------------------------|
|  <chem>Nc1c[nH]c2ccccc12</chem>     |  <chem>CC1=CC(=C(C=C1)C(=O)O)C(=O)O</chem> |  <chem>Nc1c[nH]c2ccccc12</chem>     |  <chem>Nc1c[nH]c2ccccc12</chem>     |
|  <chem>CCN1C=Cc2ccc(N)cc21</chem>   |  <chem>CCN1C=Cc2ccc(N)cc21</chem>          |  <chem>CCN1C=Cc2ccc(N)cc21</chem>   |  <chem>CCN1C=Cc2ccc(N)cc21</chem>   |
|  <chem>CCN1C=Cc2ccc(N)cc21</chem> |  <chem>CCN1C=Cc2ccc(N)cc21</chem>        |  <chem>CCN1C=Cc2ccc(N)cc21</chem> |  <chem>CCN1C=Cc2ccc(N)cc21</chem> |
|  <chem>CCN1C=Cc2ccc(N)cc21</chem> |  <chem>CCN1C=Cc2ccc(N)cc21</chem>        |  <chem>CCN1C=Cc2ccc(N)cc21</chem> |  <chem>CCN1C=Cc2ccc(N)cc21</chem> |
|  <chem>CCN1C=Cc2ccc(N)cc21</chem> |  <chem>CCN1C=Cc2ccc(N)cc21</chem>        |  <chem>CCN1C=Cc2ccc(N)cc21</chem> |  <chem>CCN1C=Cc2ccc(N)cc21</chem> |

|                                                                                     |                                                                                     |                                                                                      |                                                                                       |
|-------------------------------------------------------------------------------------|-------------------------------------------------------------------------------------|--------------------------------------------------------------------------------------|---------------------------------------------------------------------------------------|
|    |    |    |    |
|    |    |    |    |
|  |  |   |  |
|  |  |  |  |
|  |  |  |  |

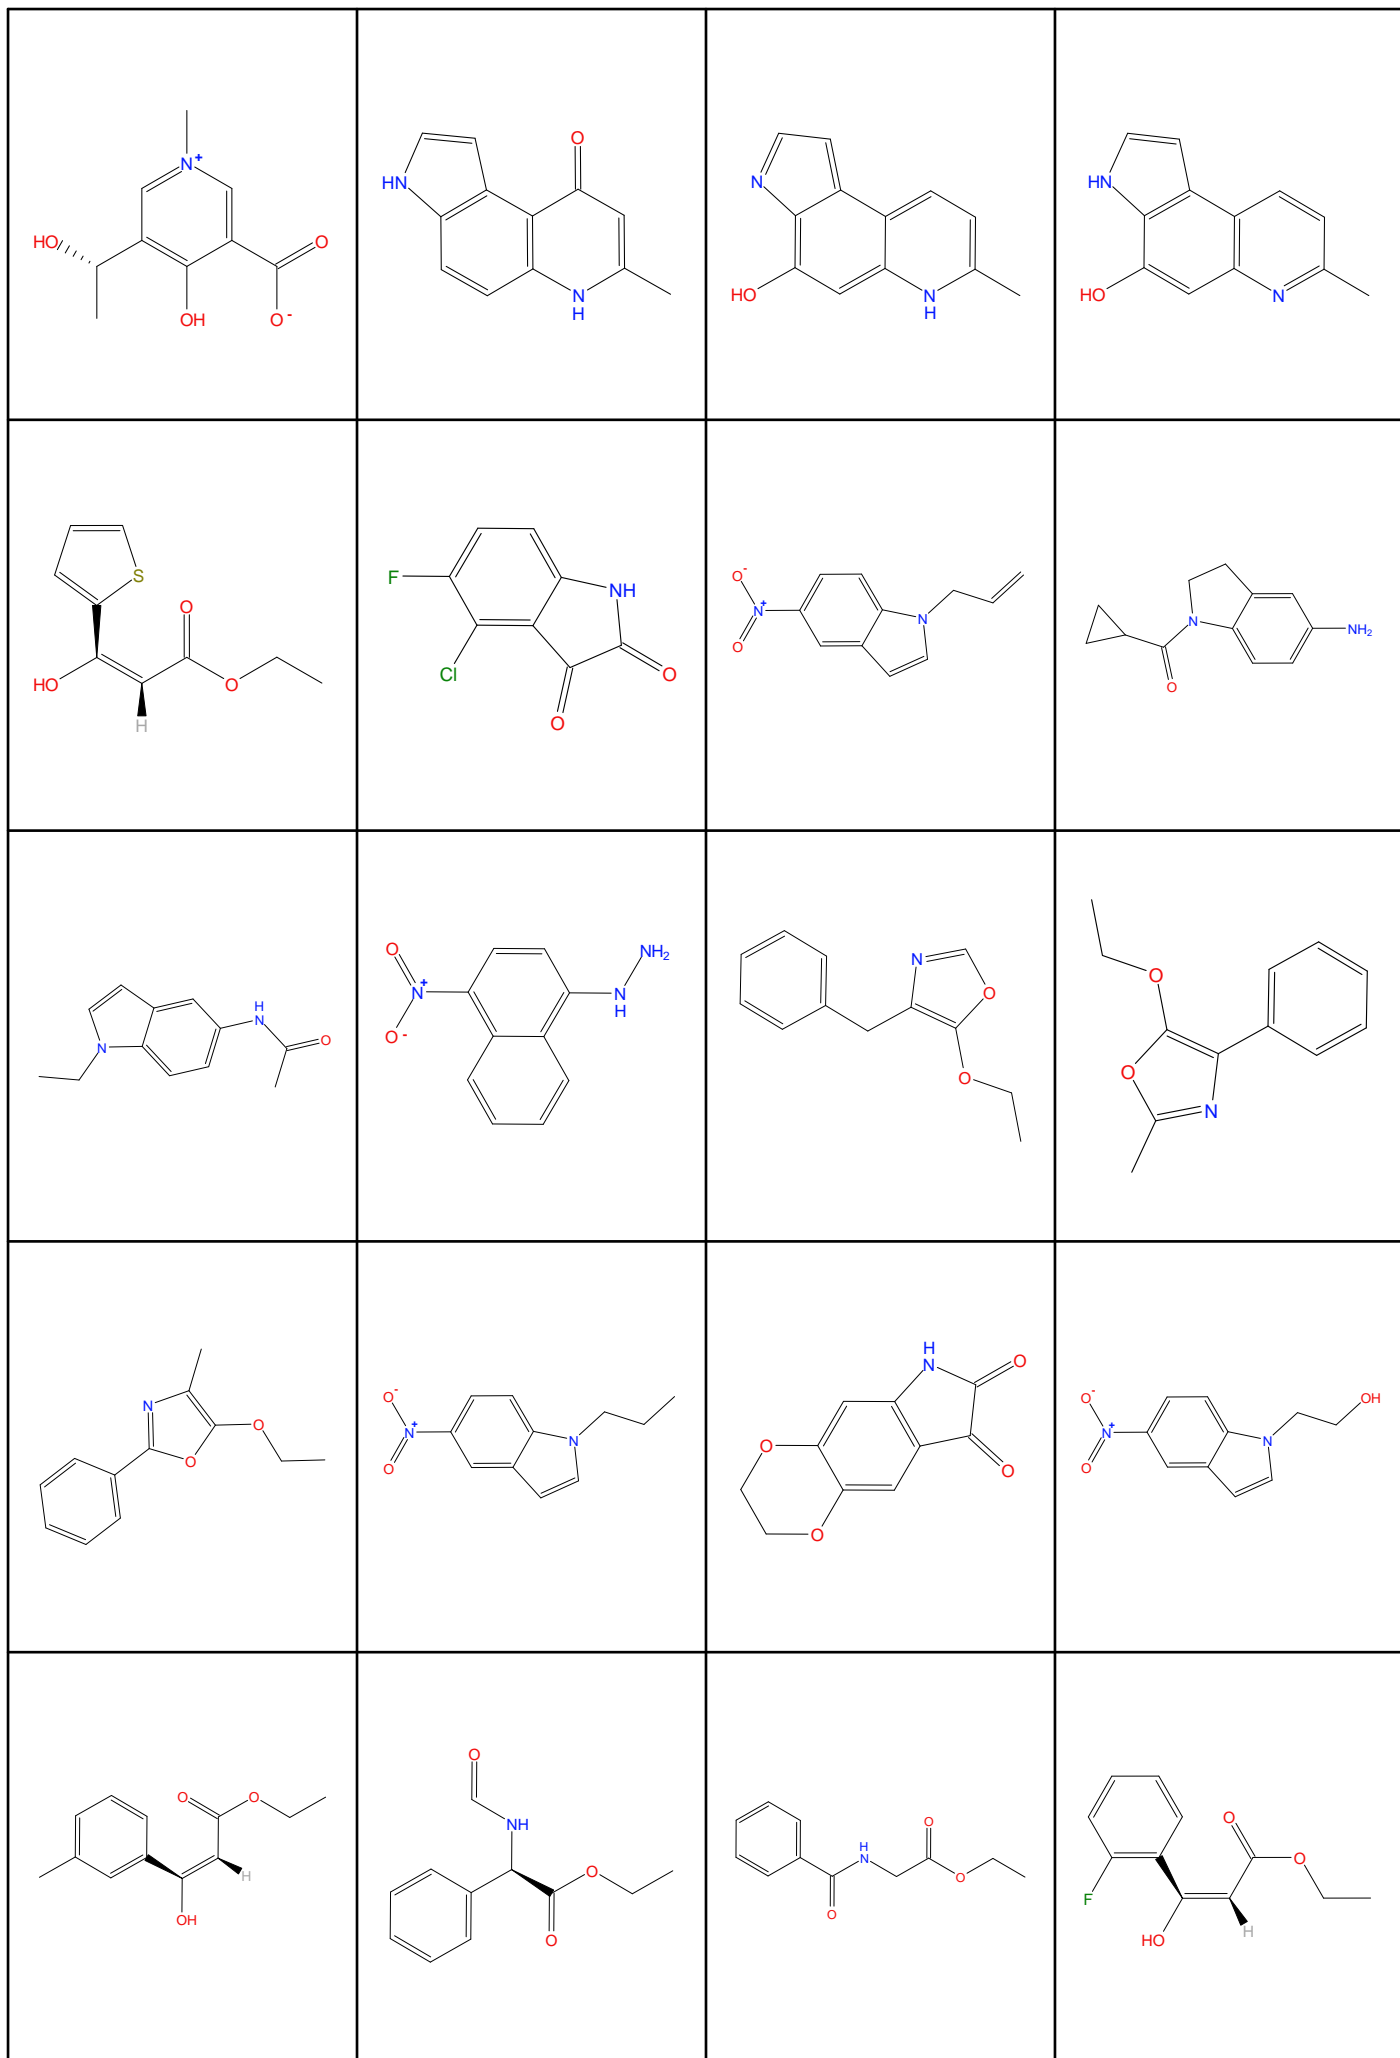

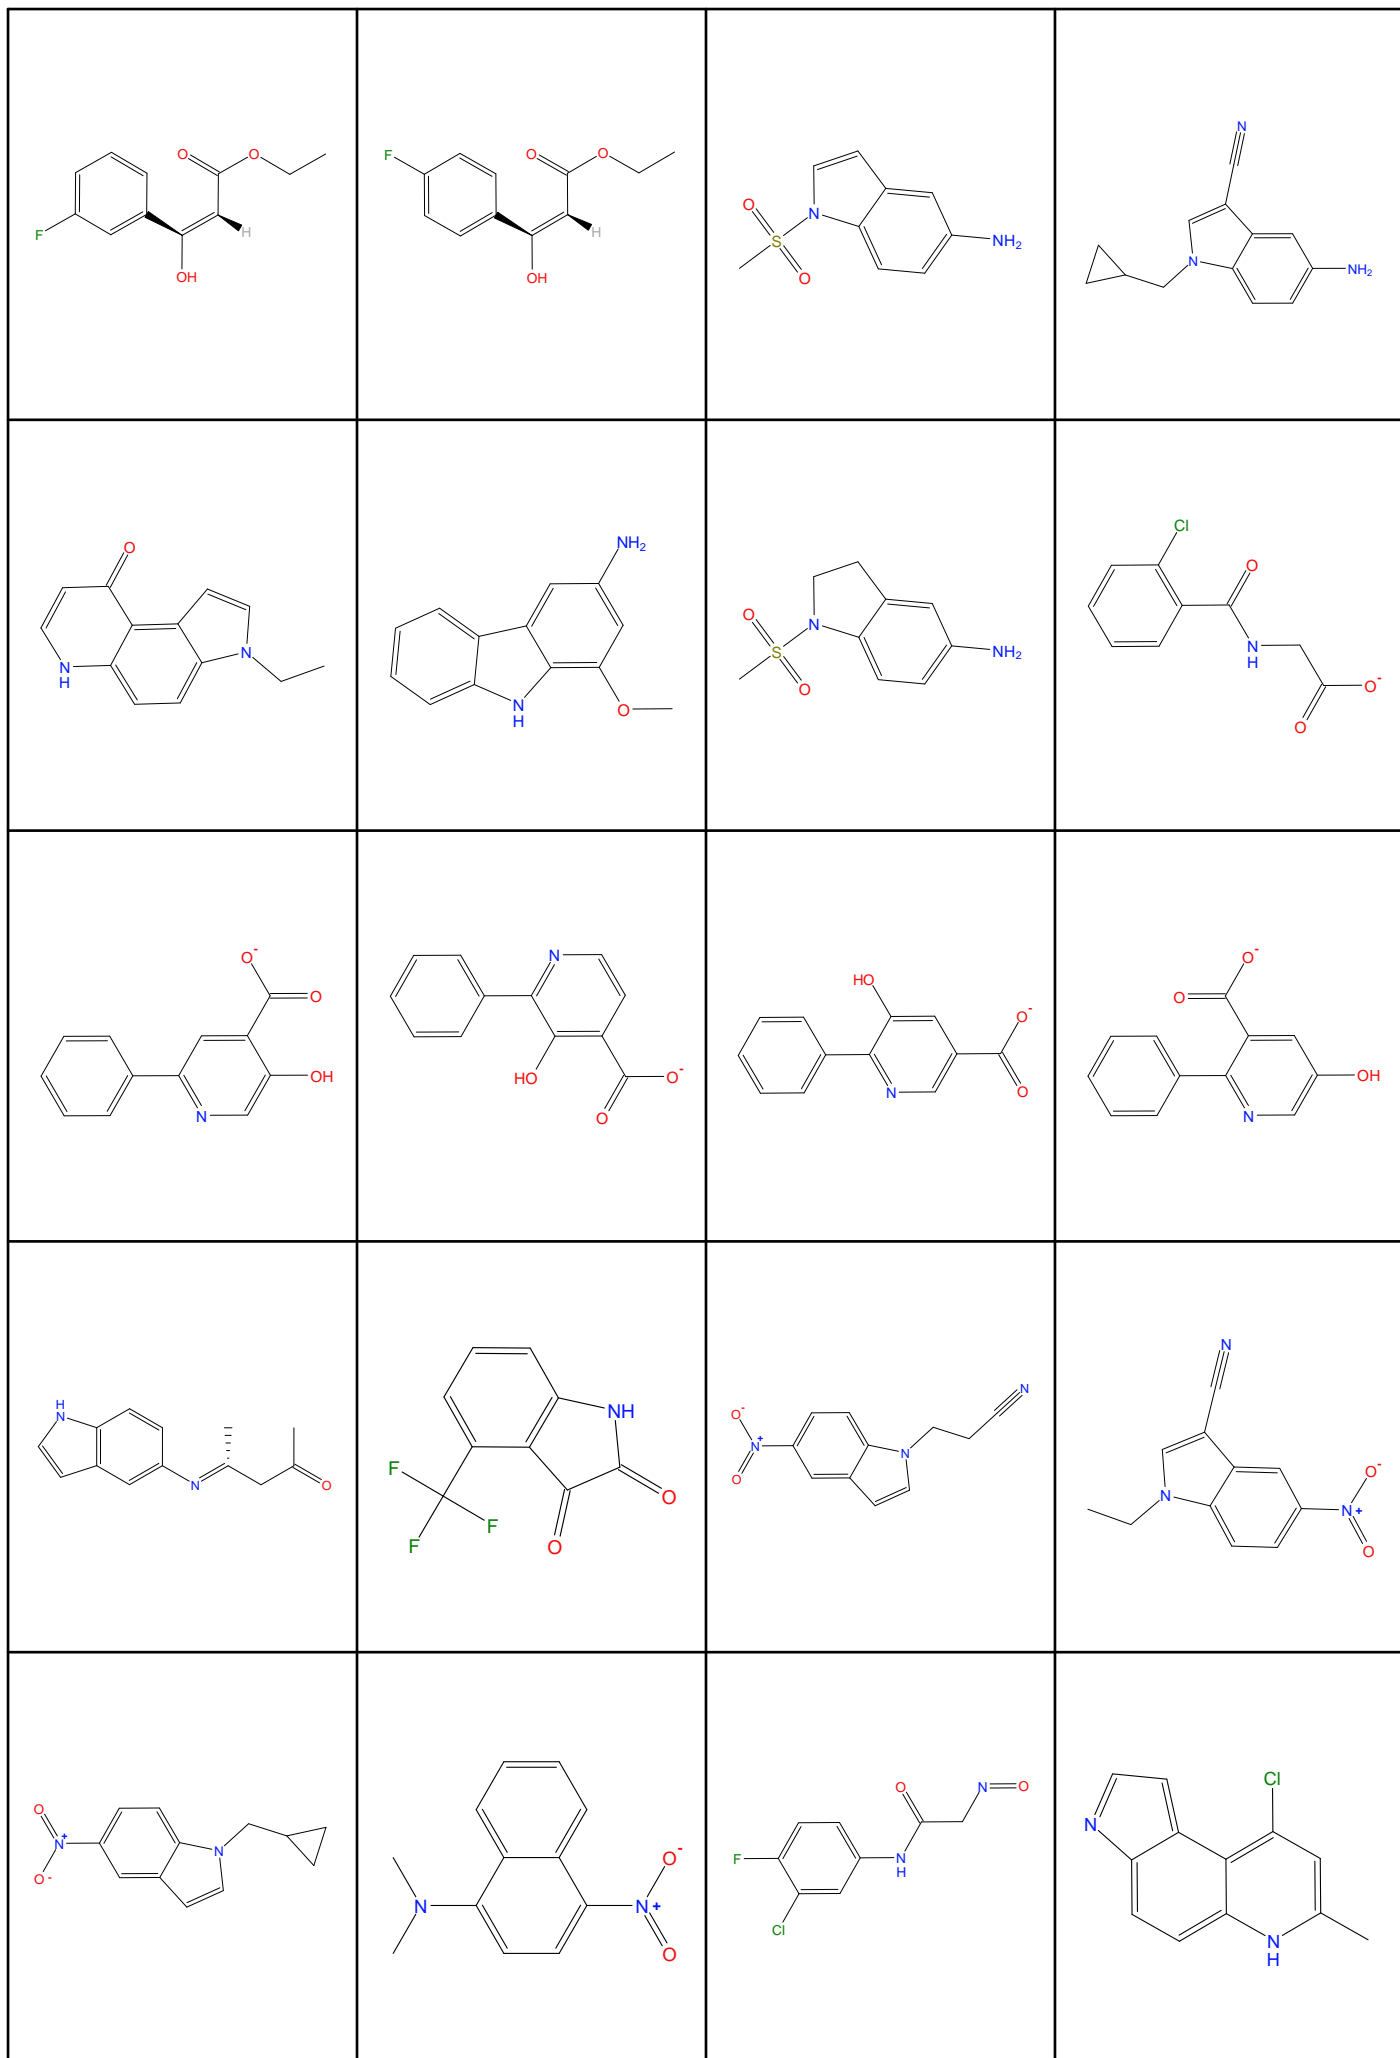

|                                                                                     |                                                                                     |                                                                                      |                                                                                       |
|-------------------------------------------------------------------------------------|-------------------------------------------------------------------------------------|--------------------------------------------------------------------------------------|---------------------------------------------------------------------------------------|
|    |    |    |    |
|    |    |    |    |
|  |  |  |  |
|  |  |  |  |
|  |  |  |  |

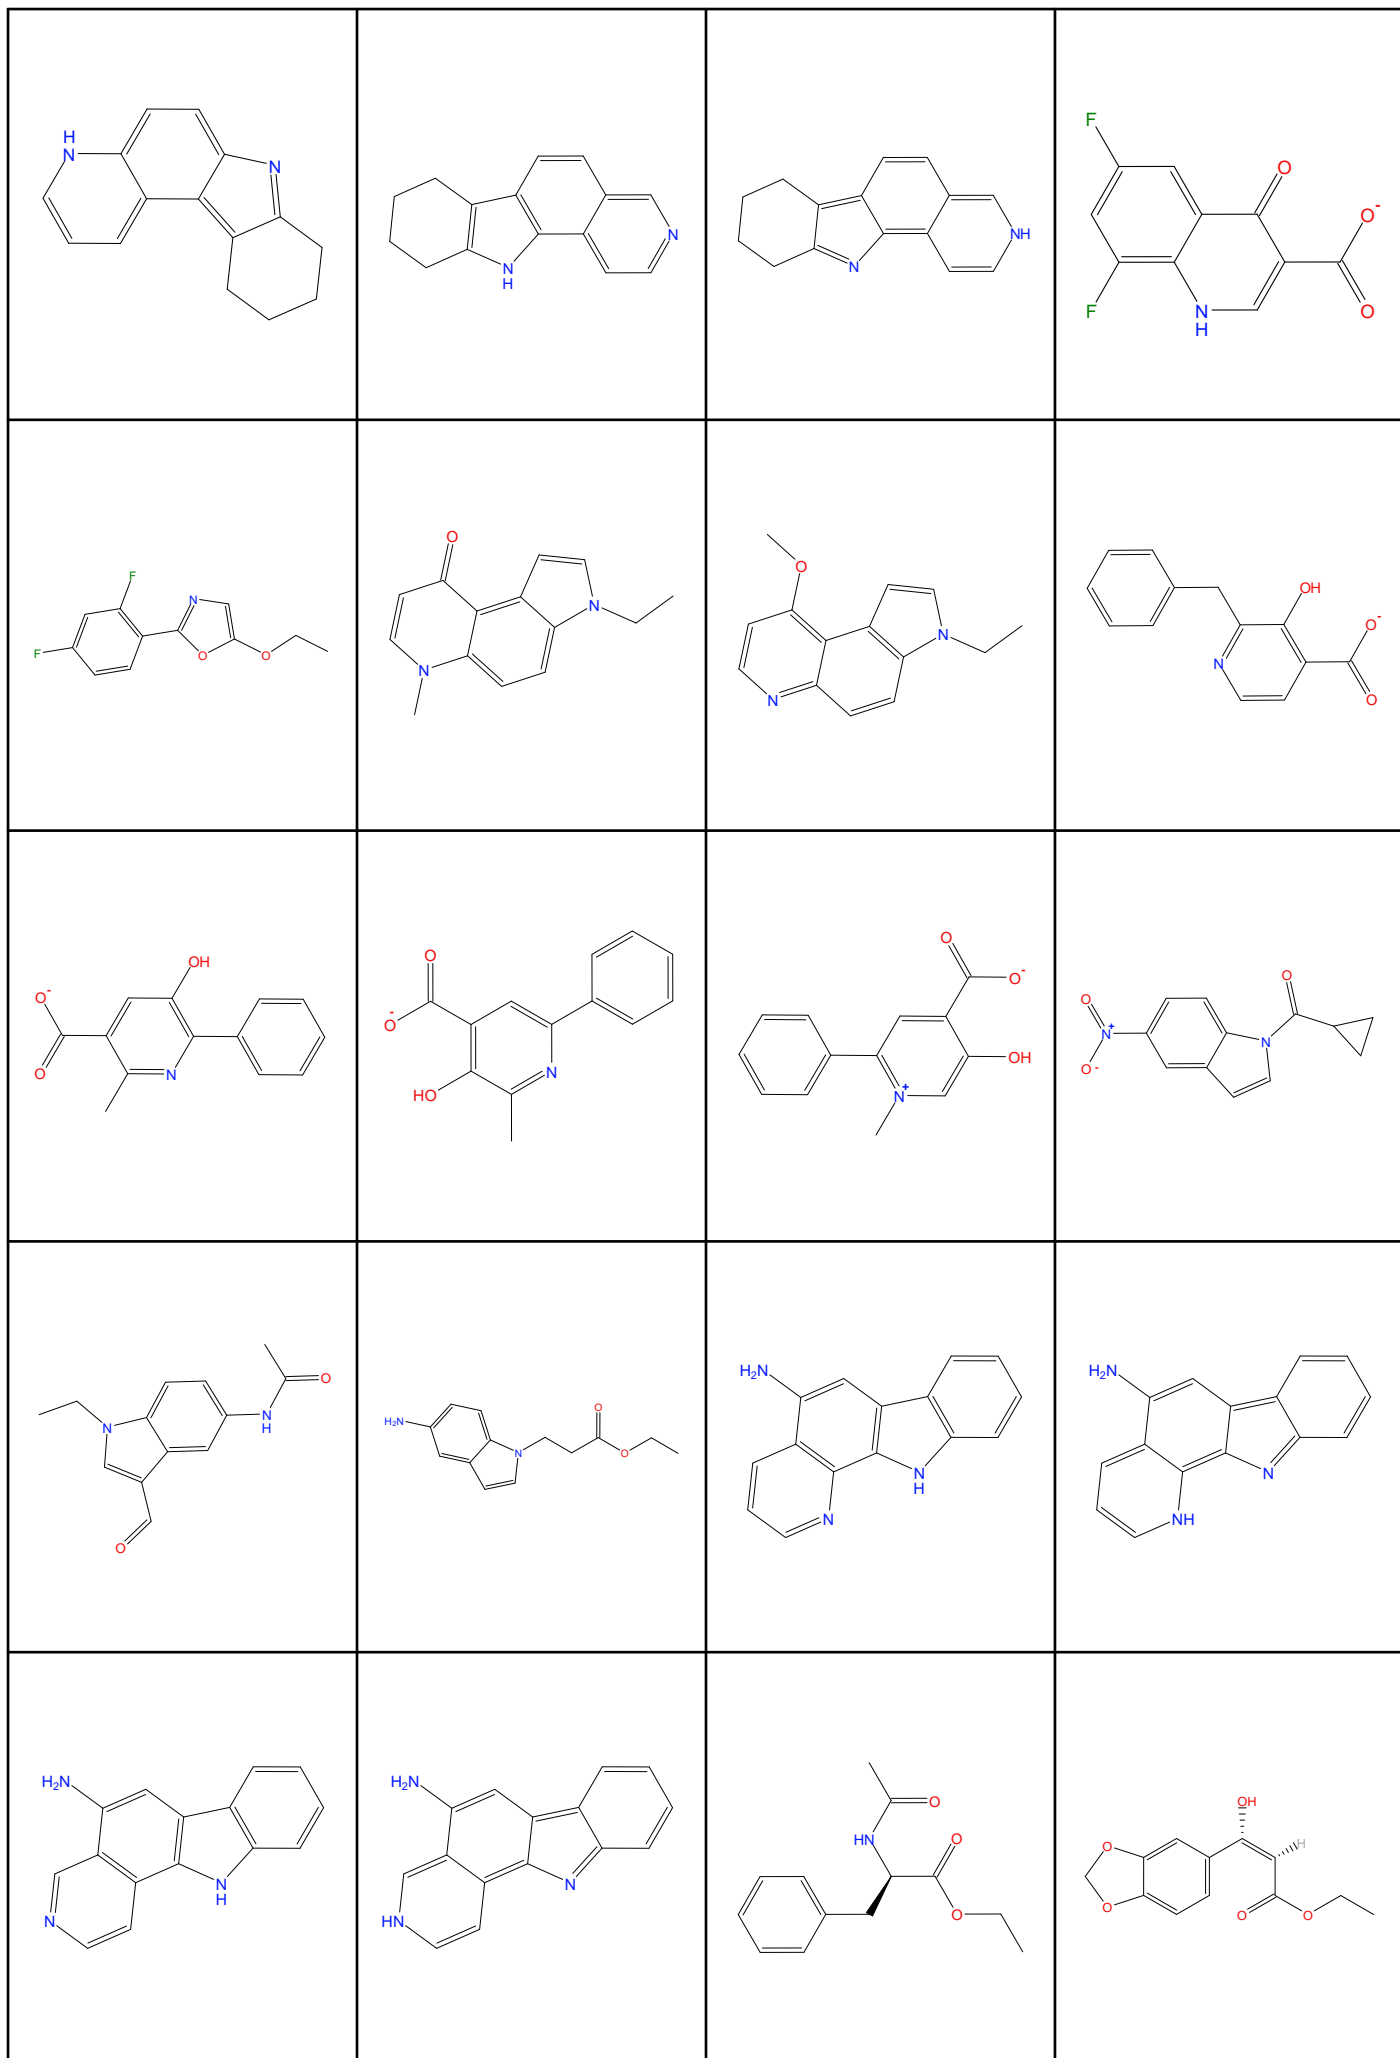

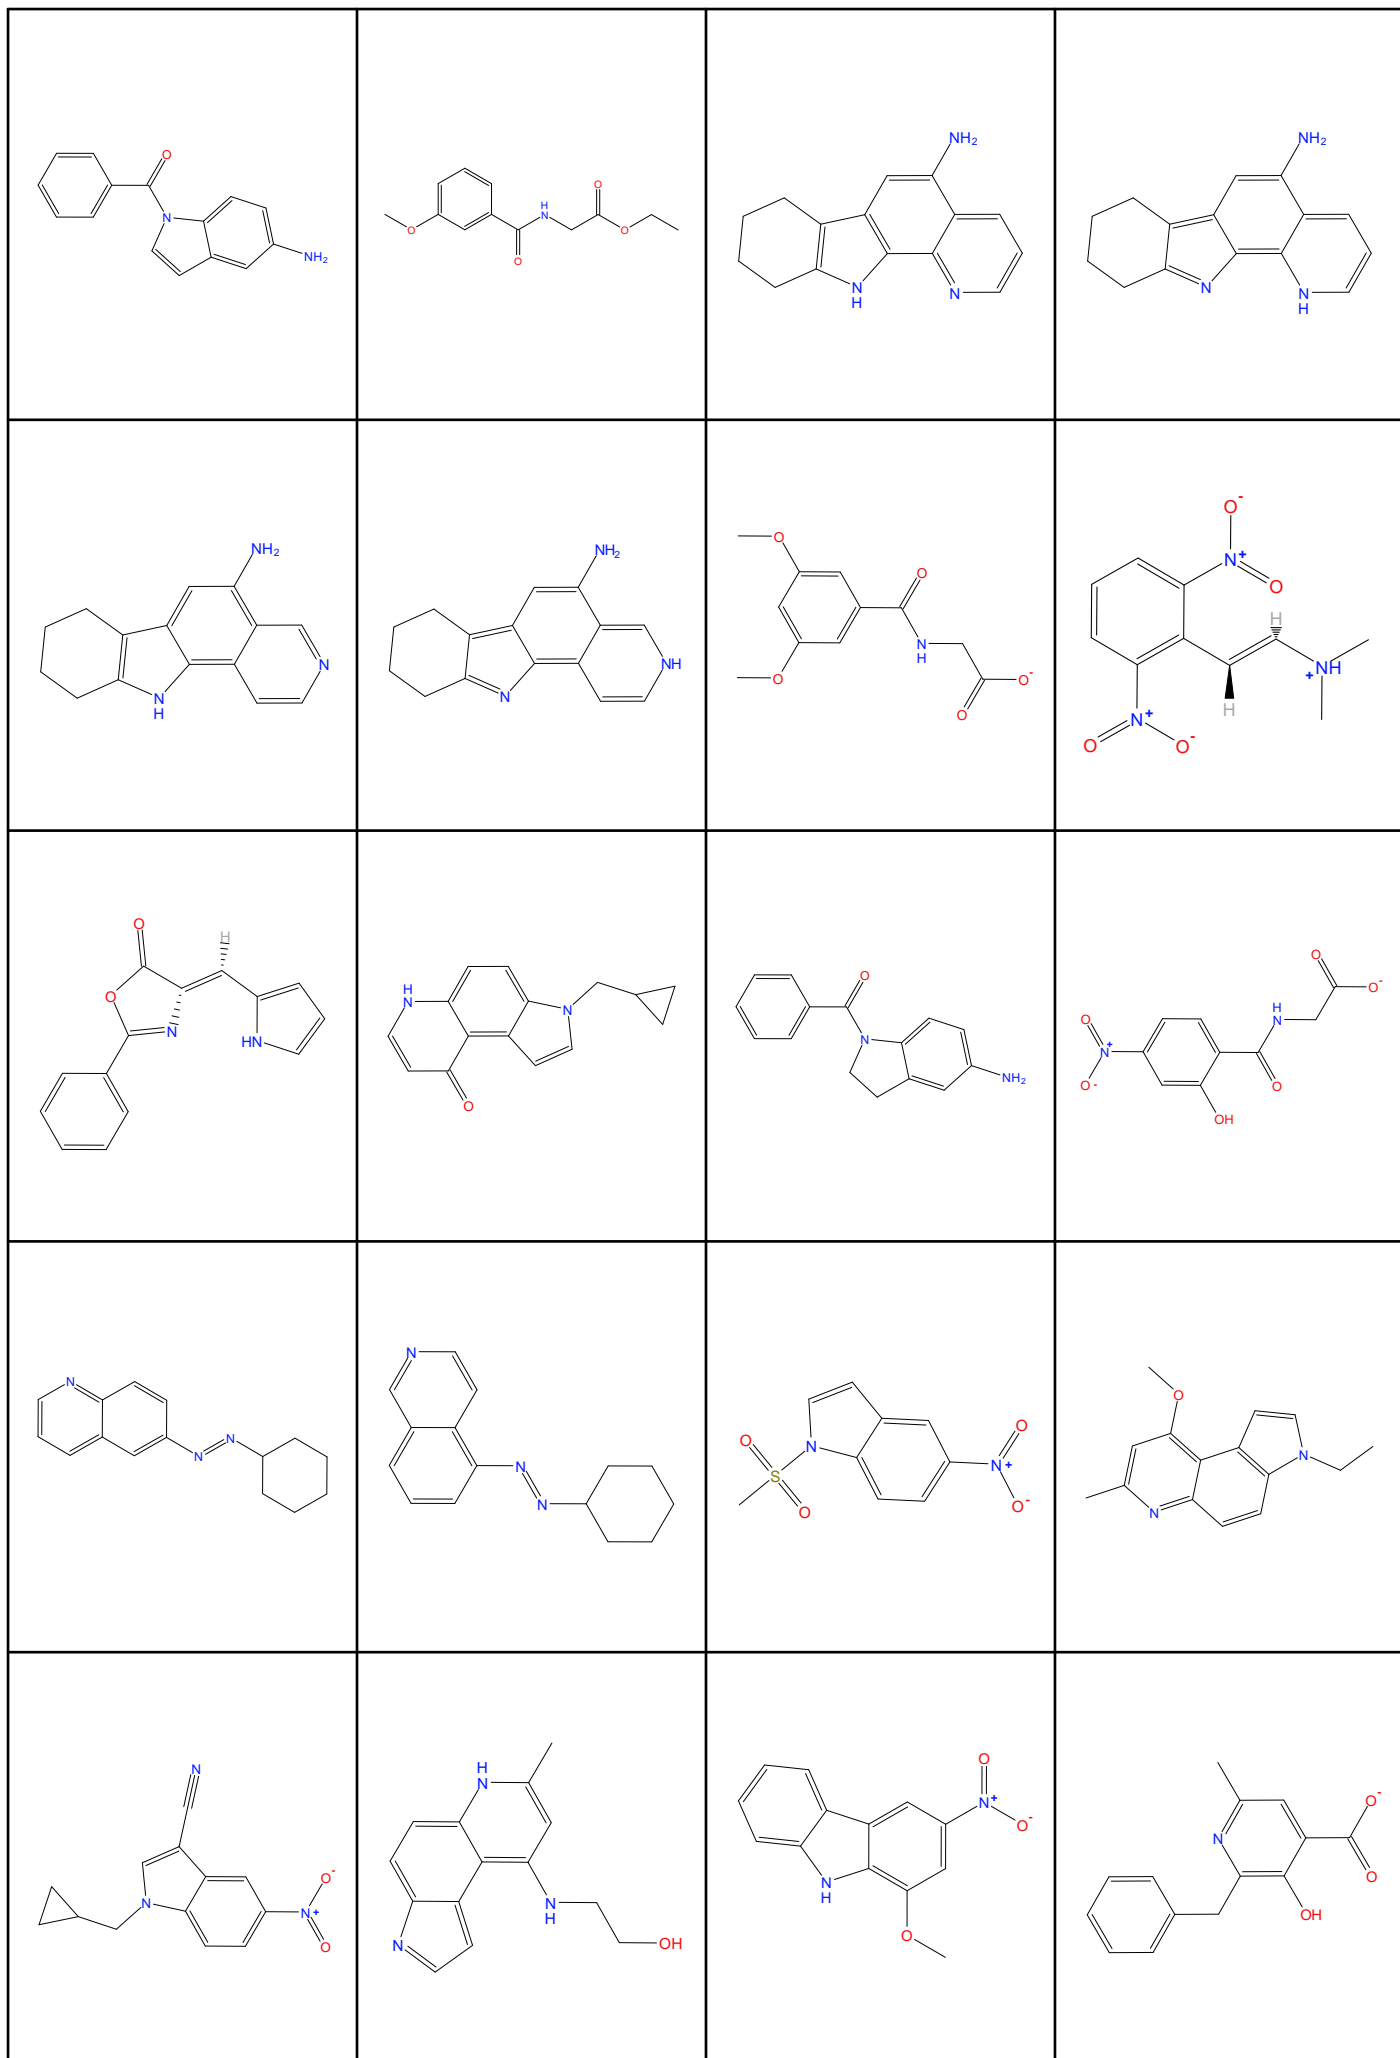

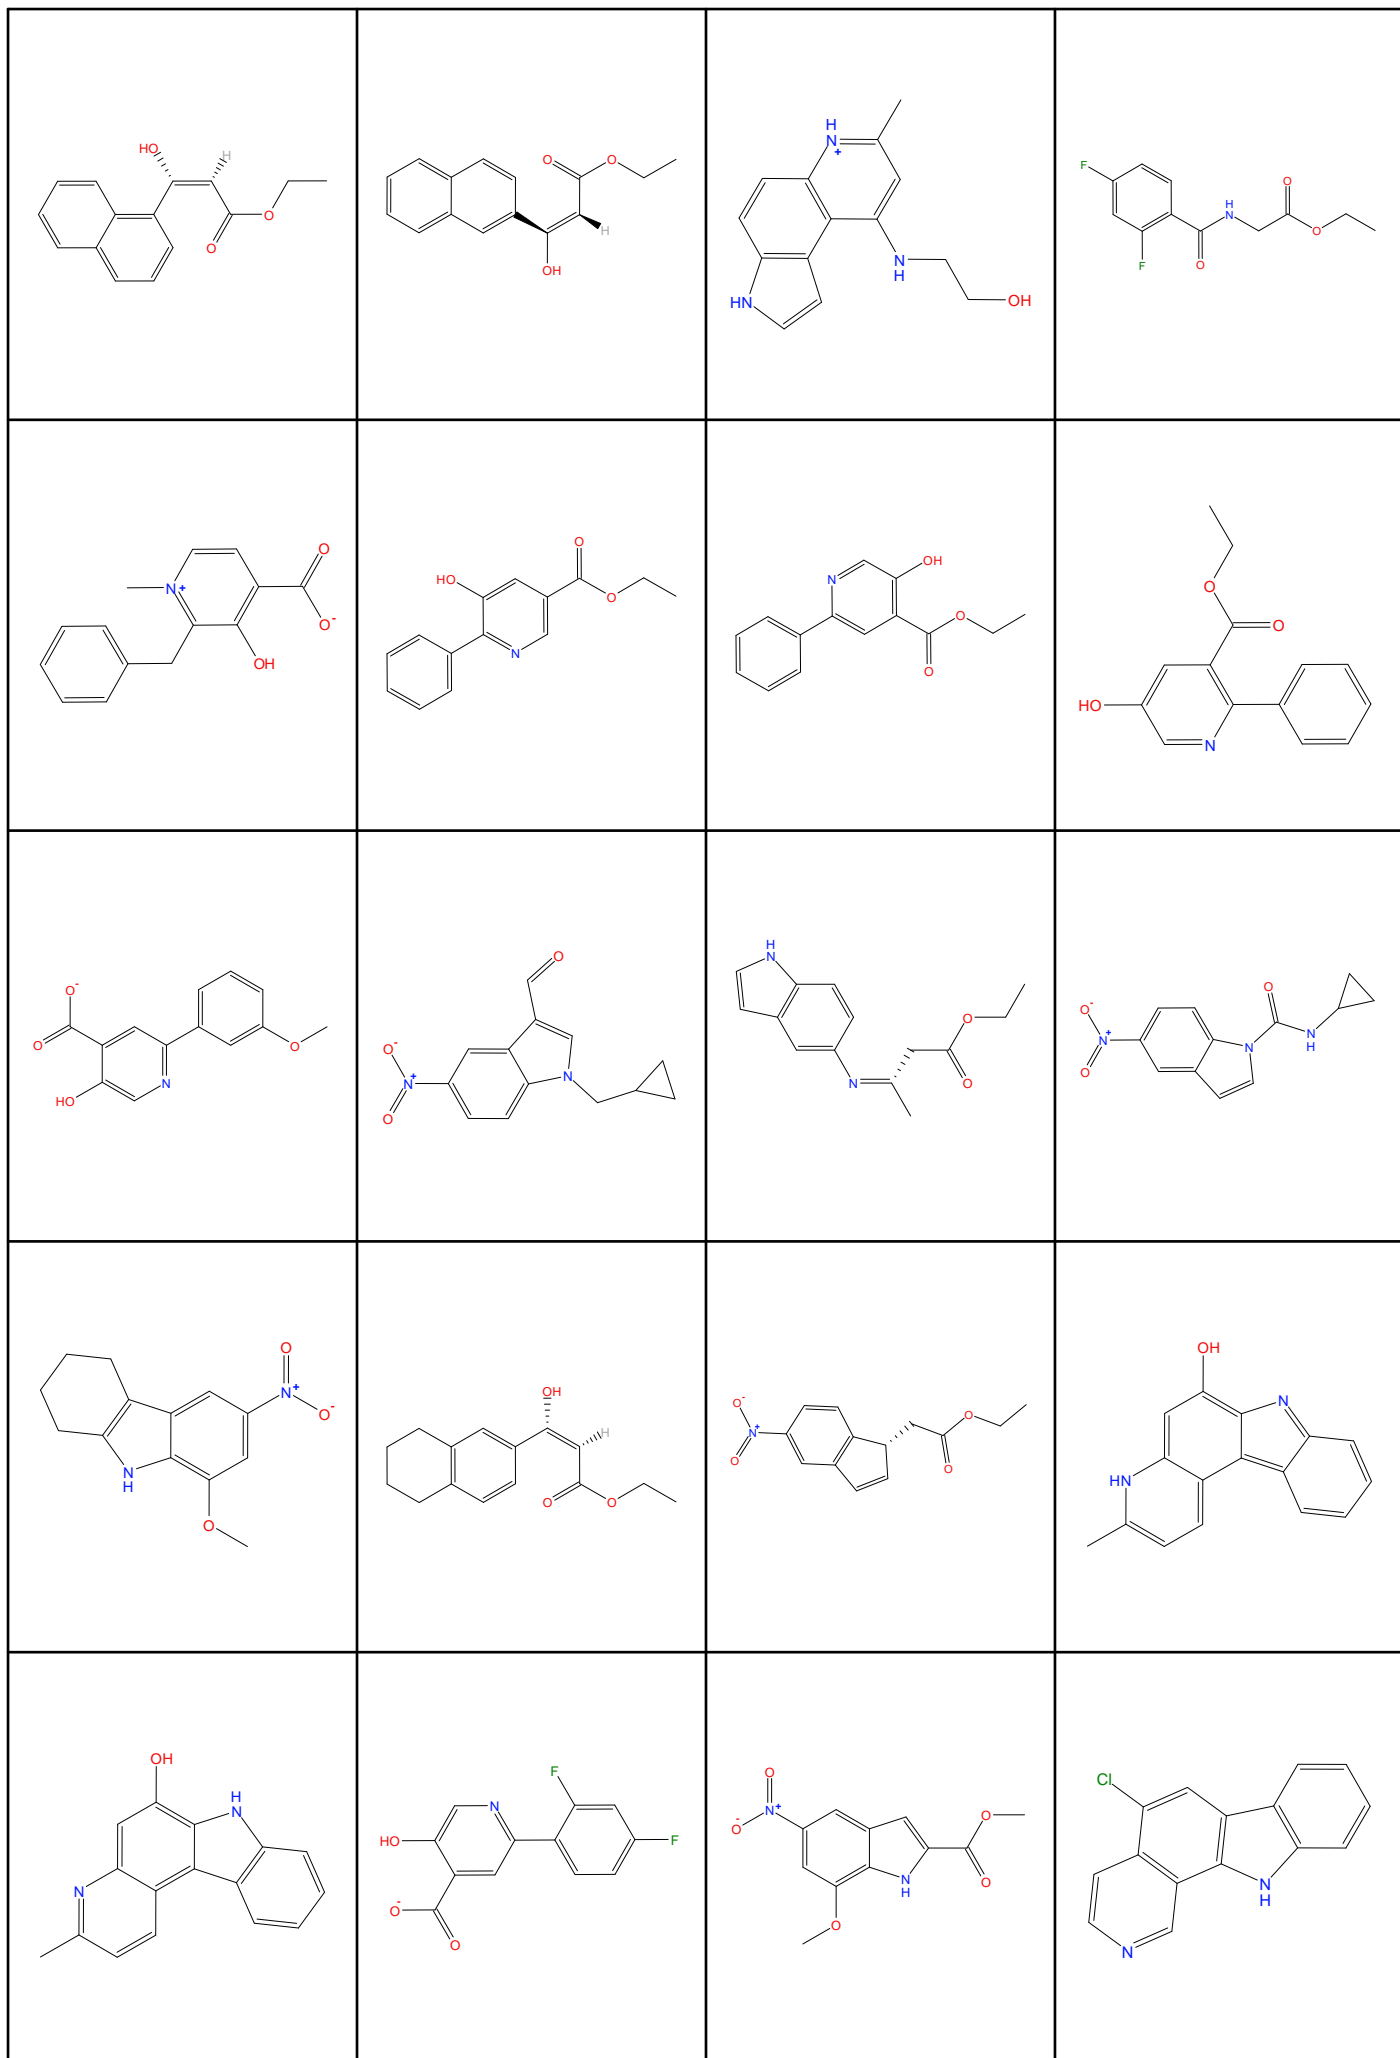



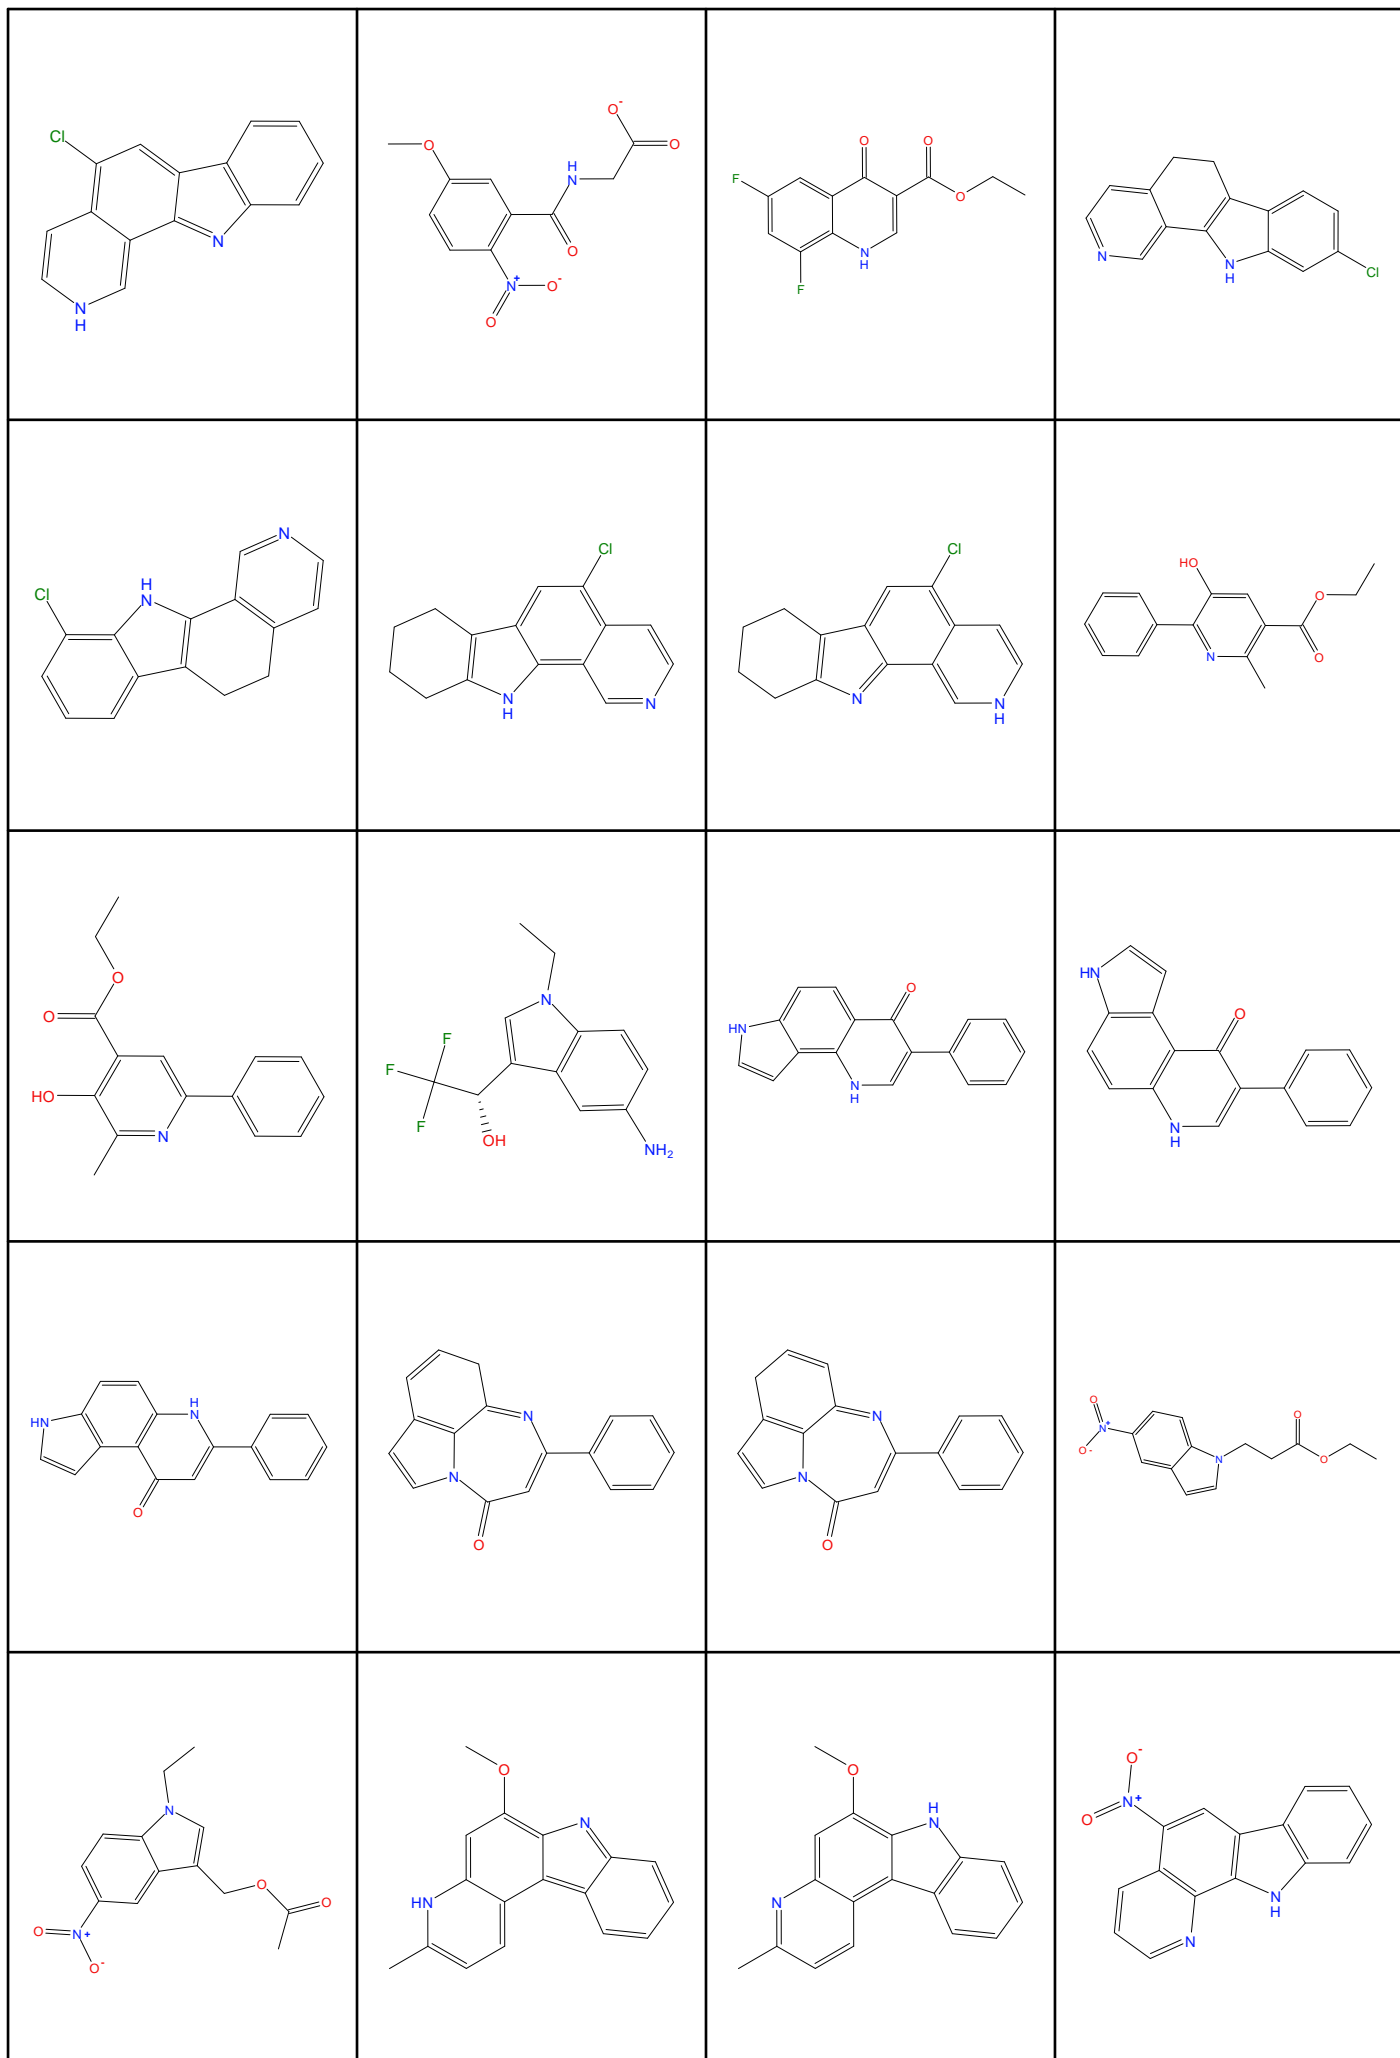

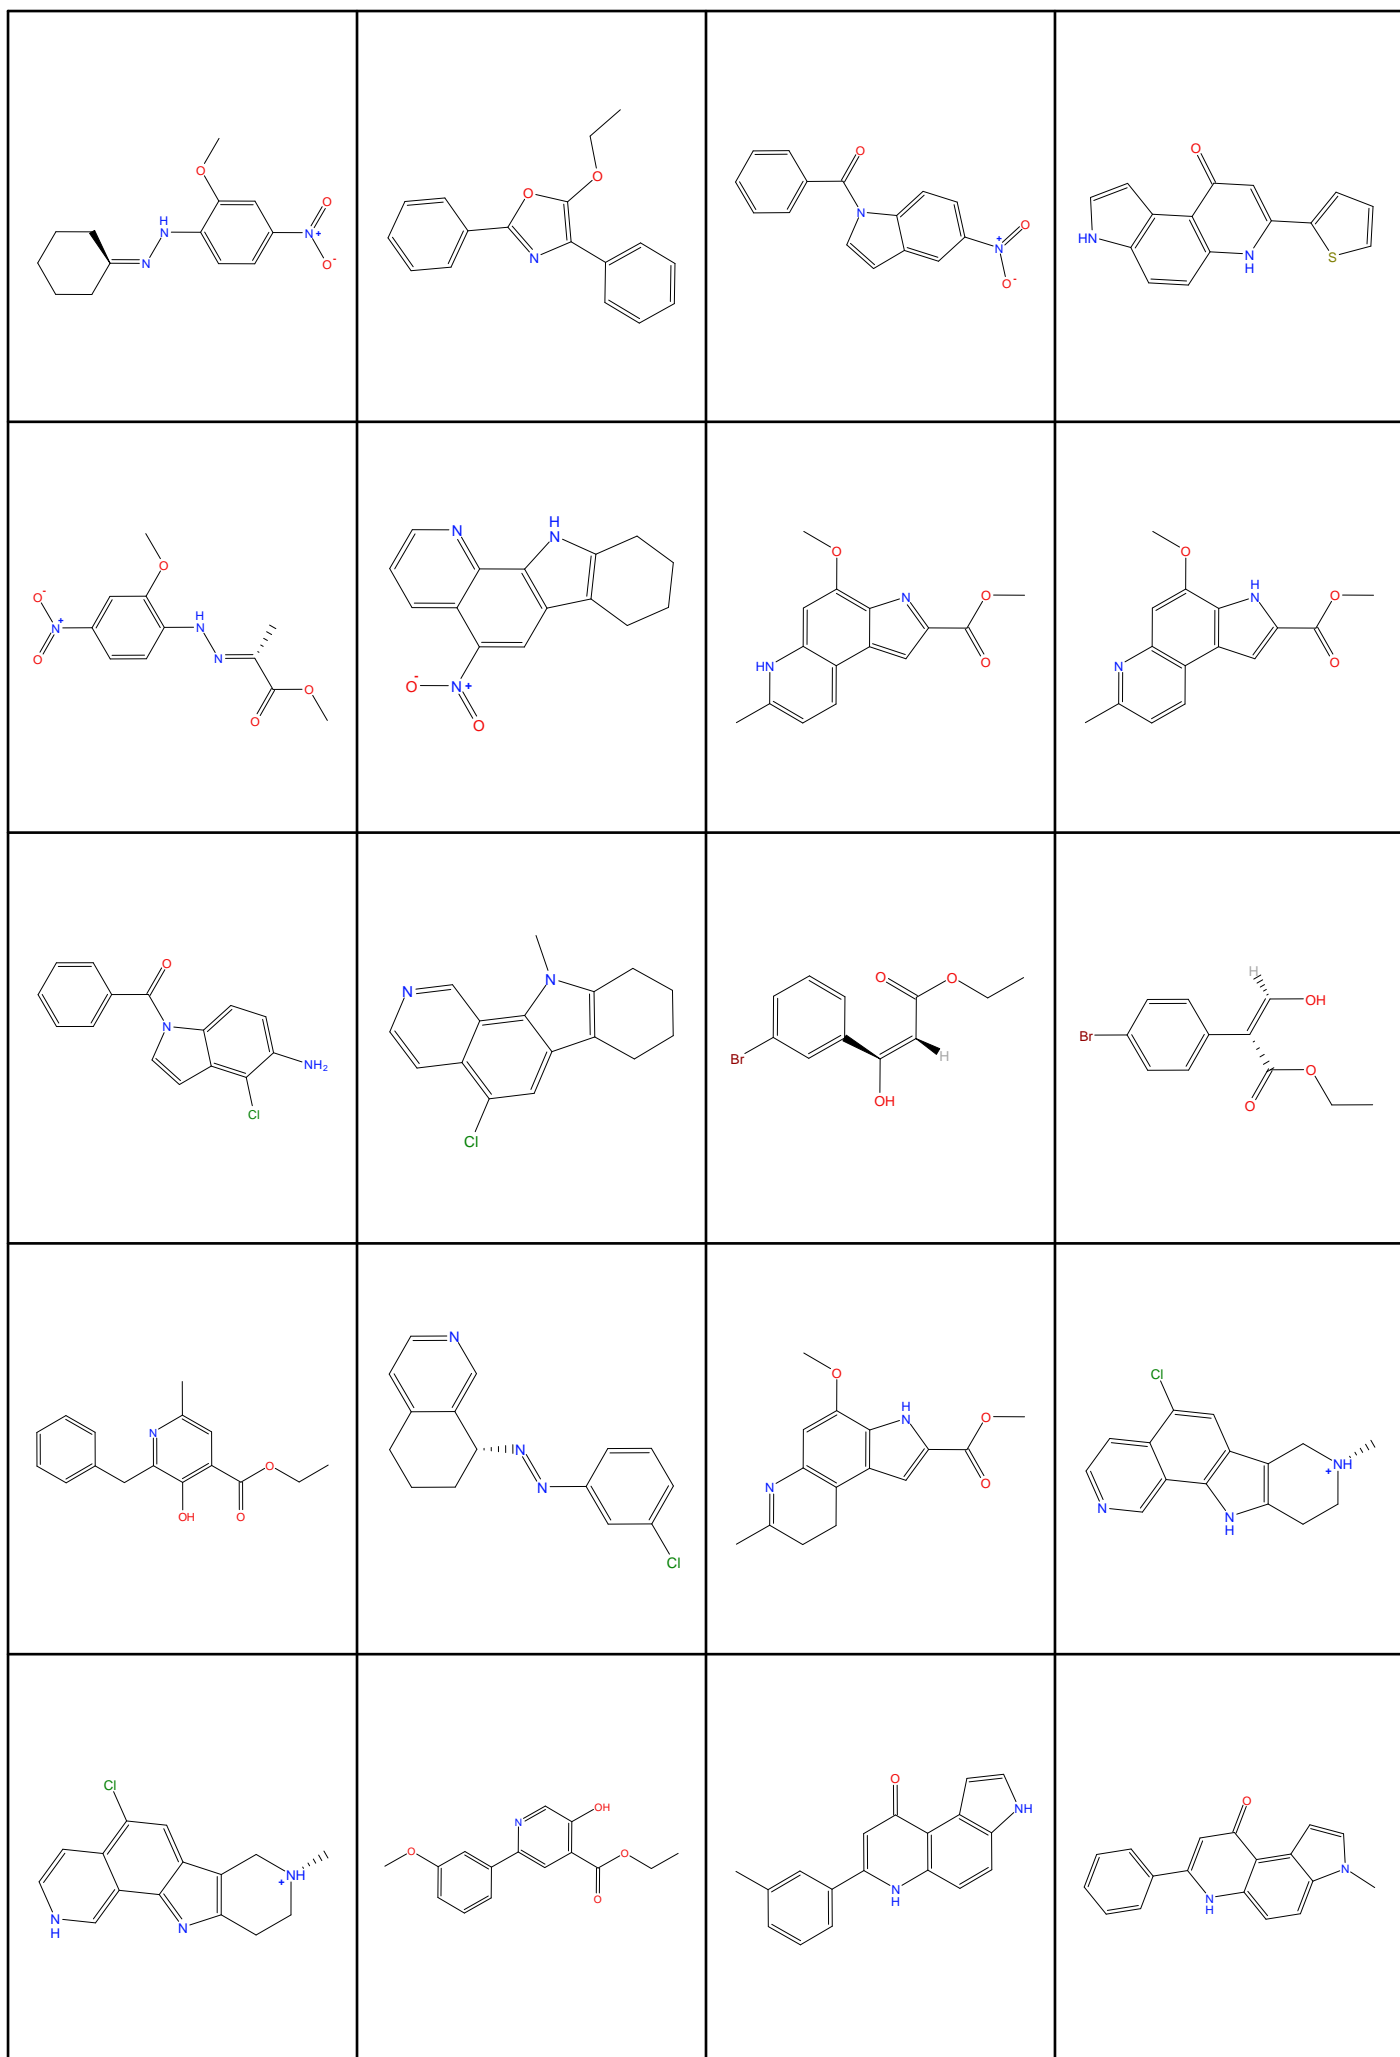

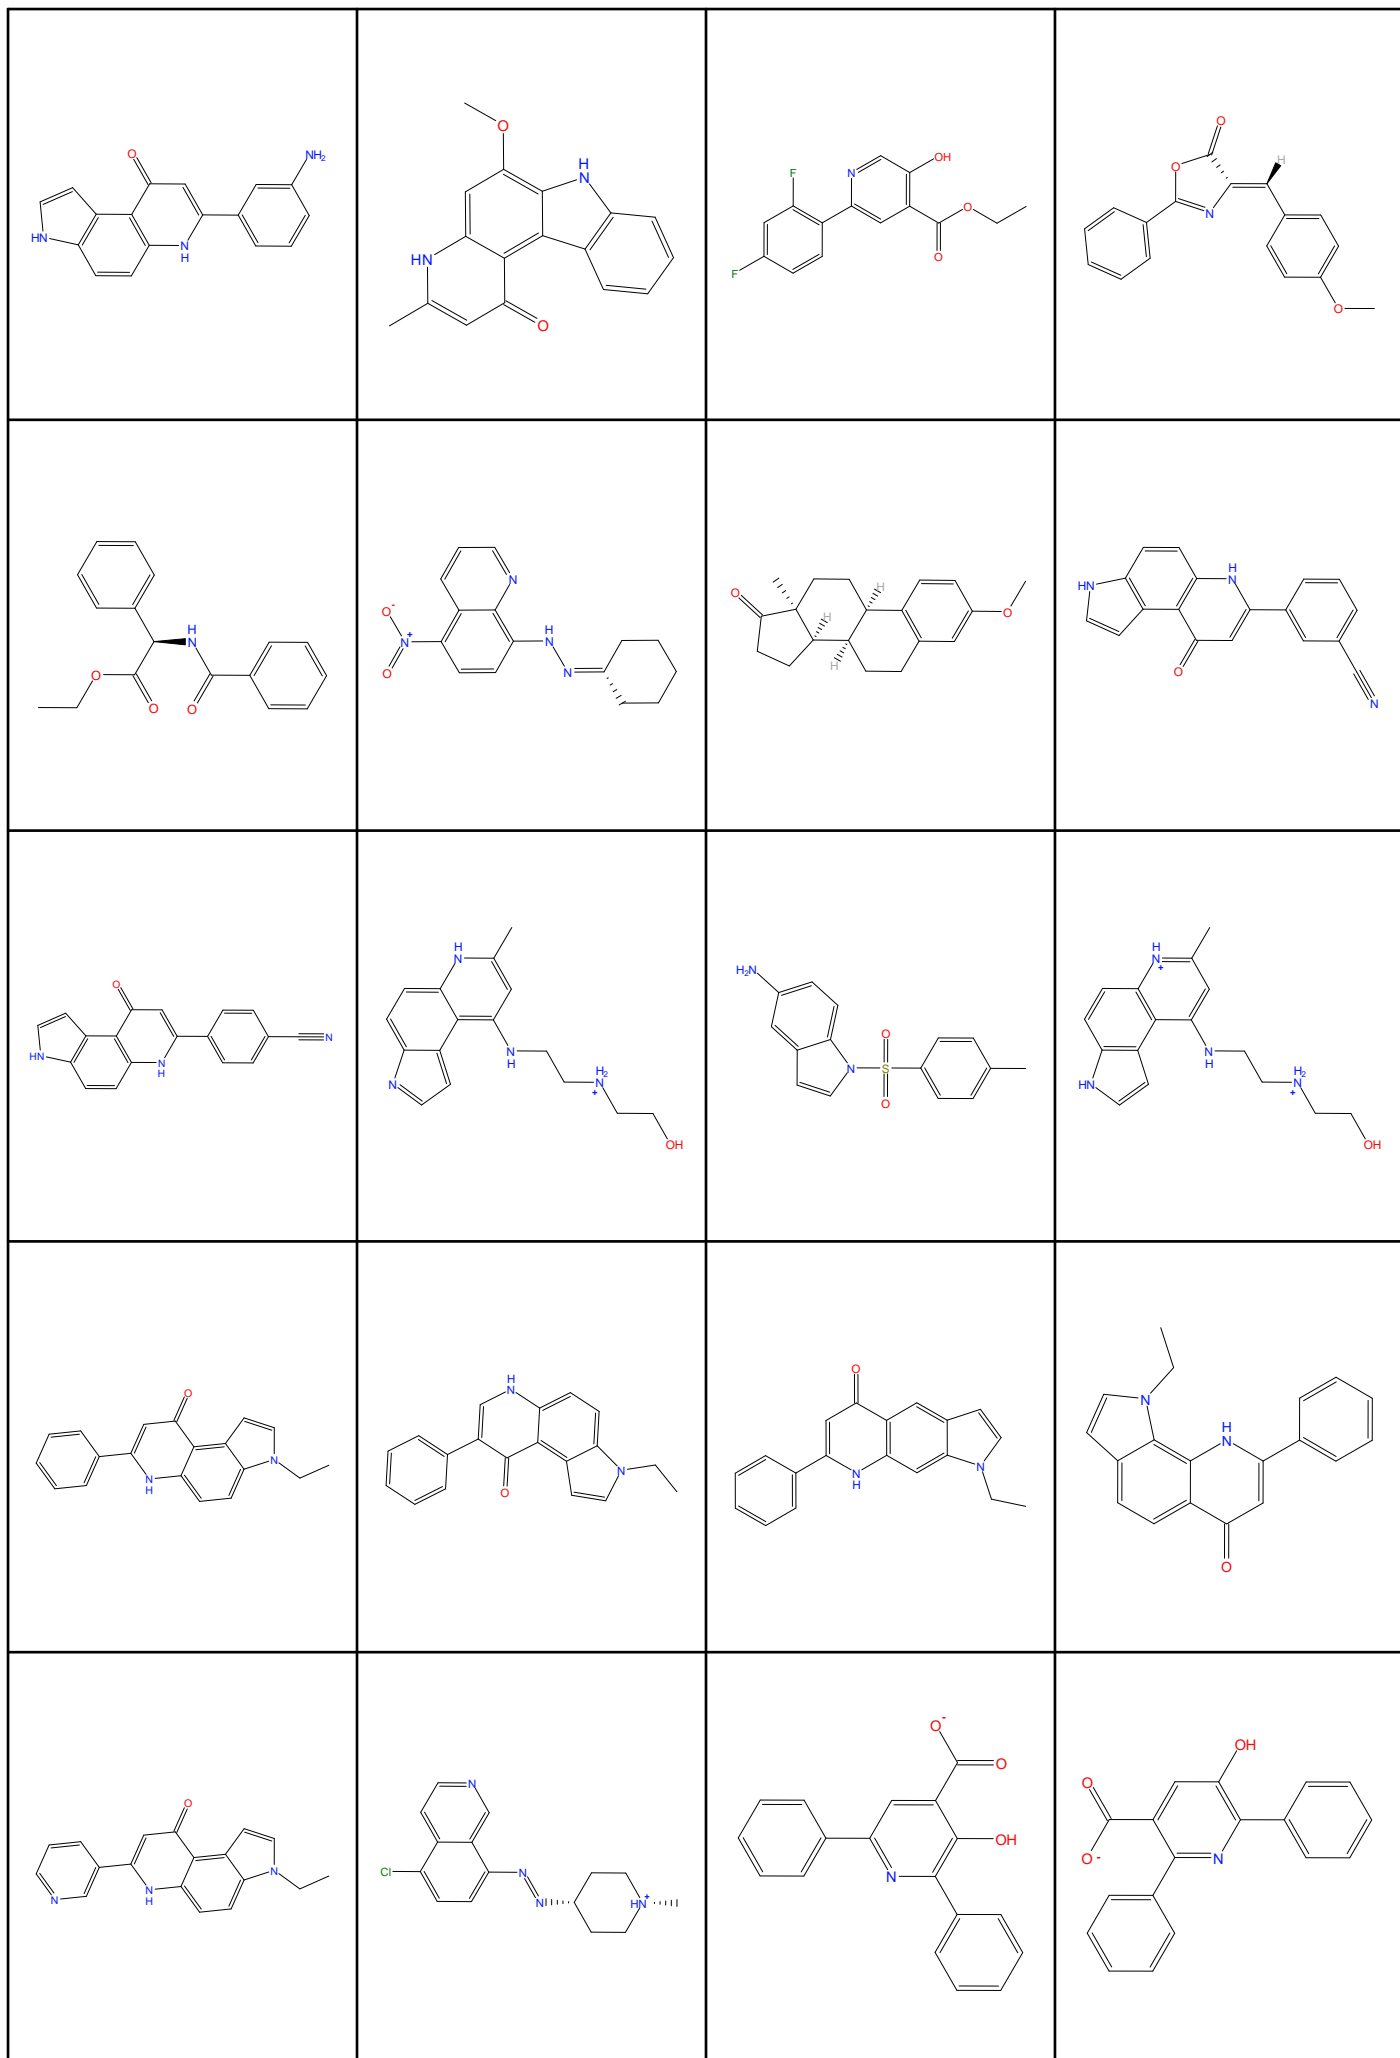

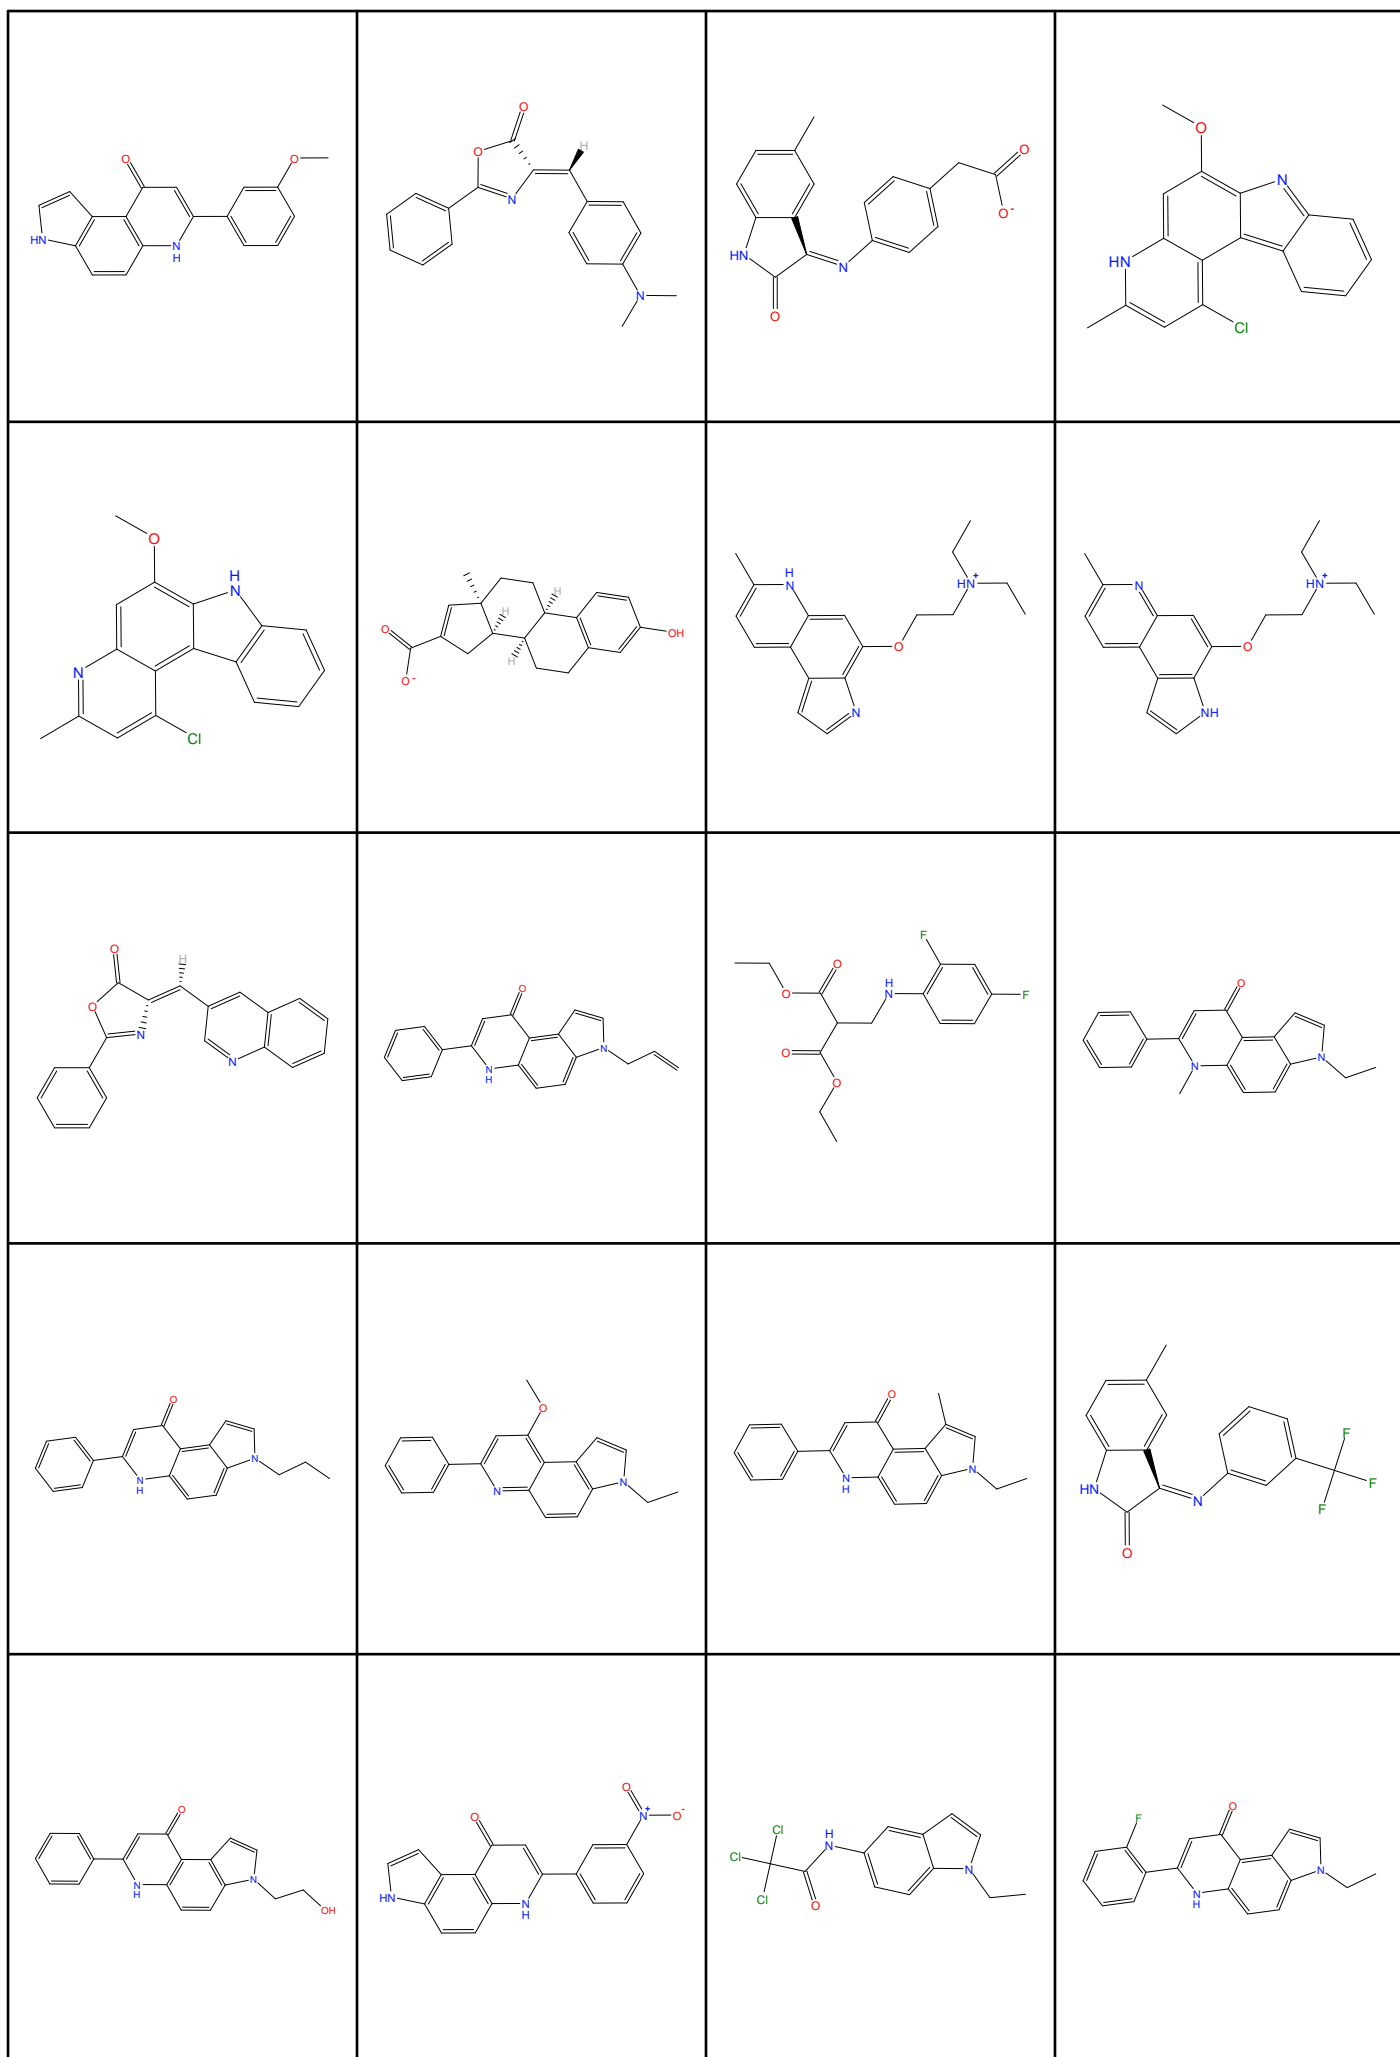

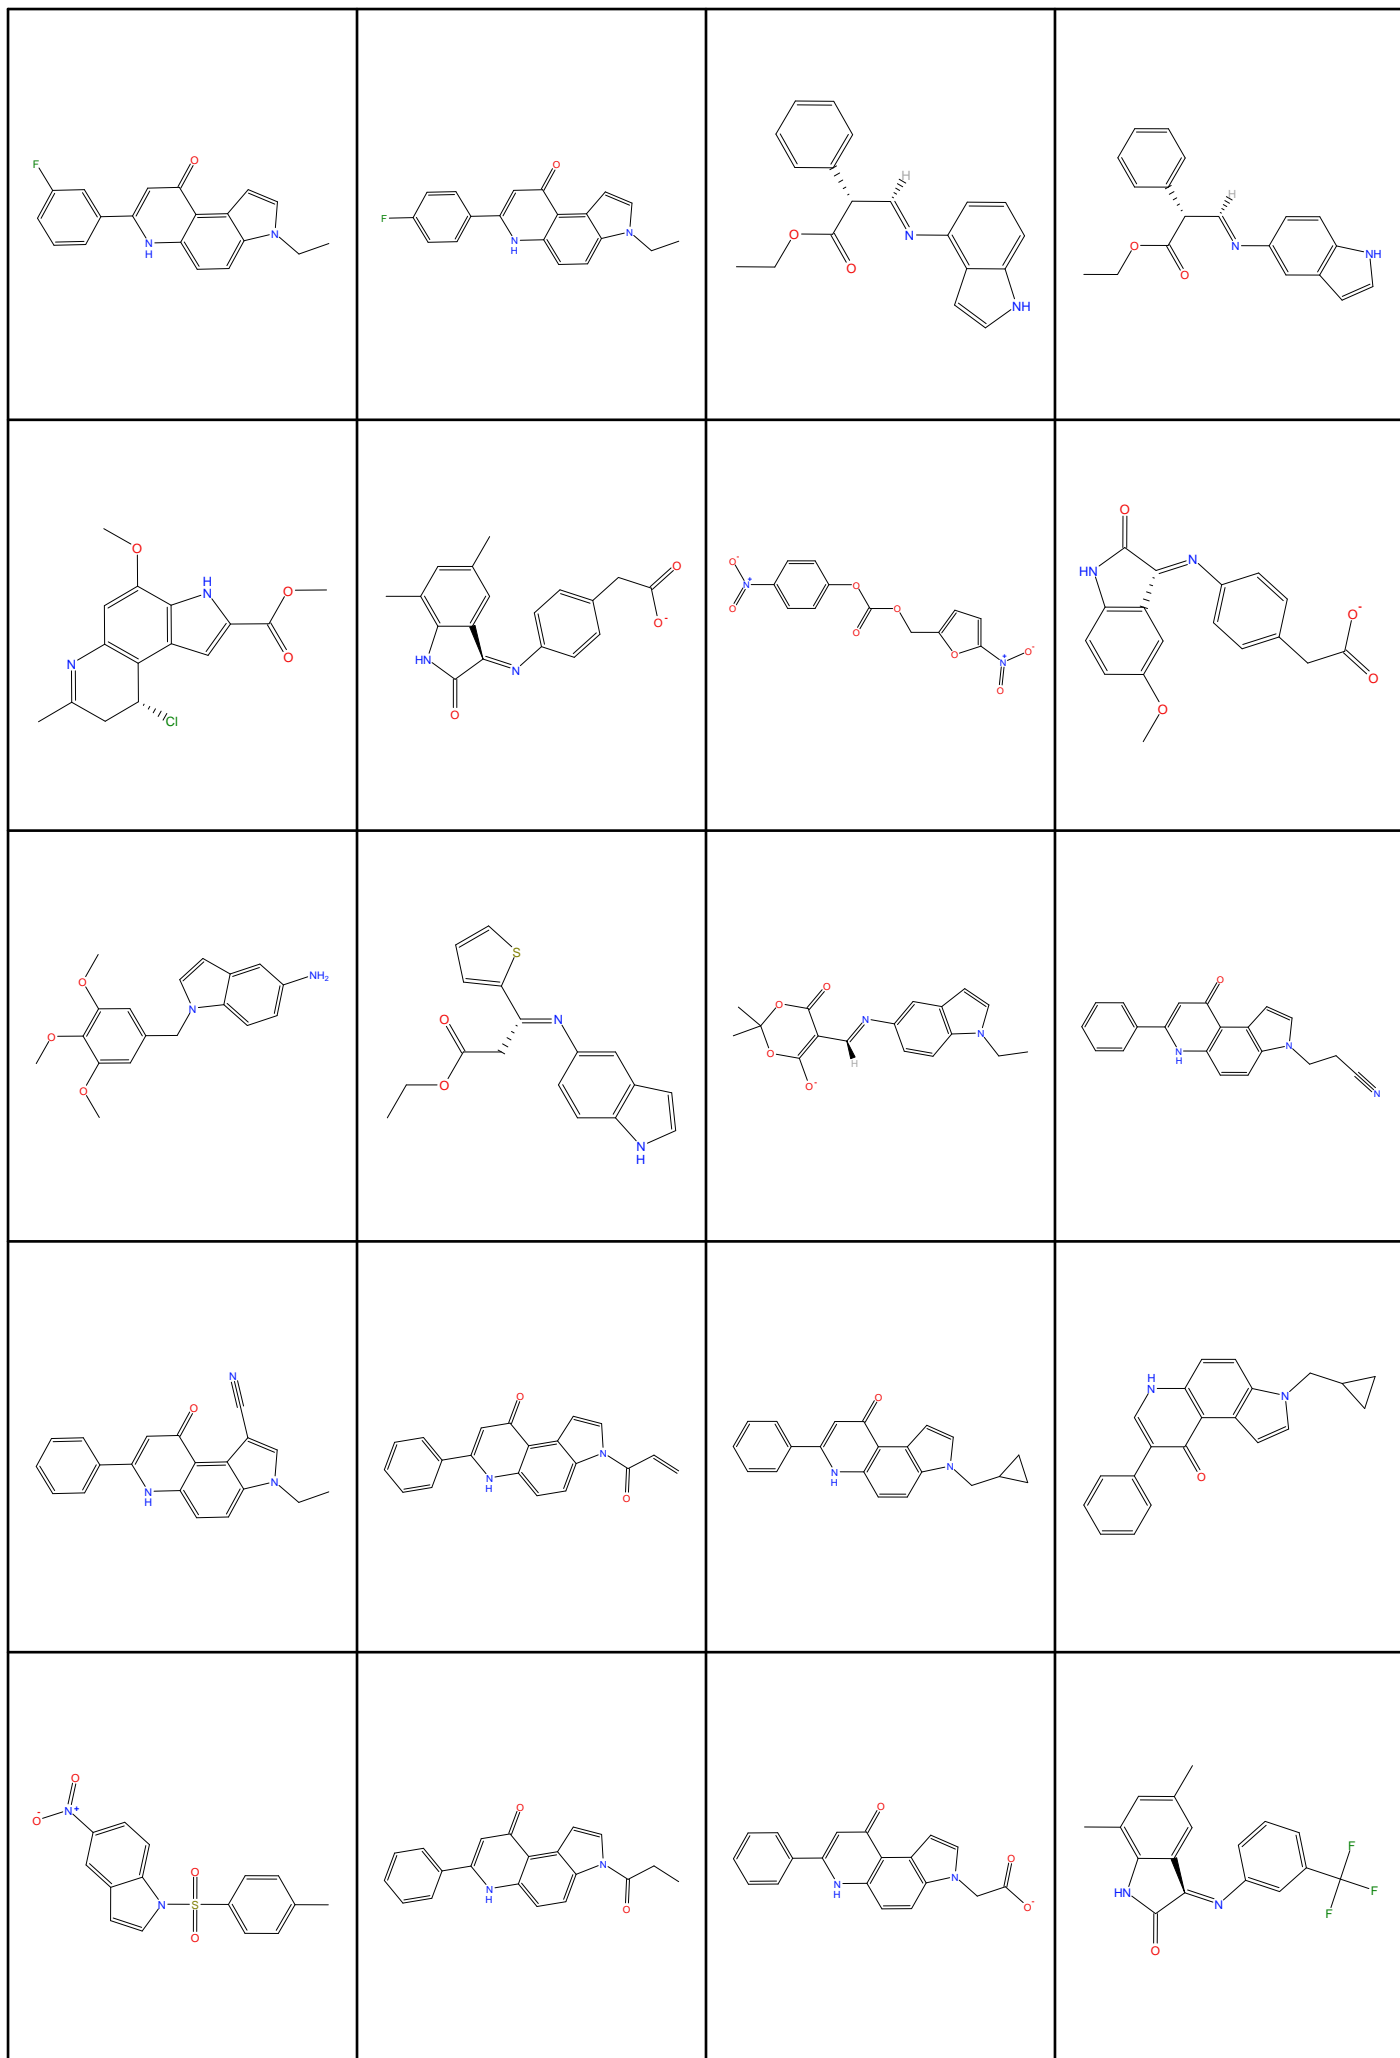

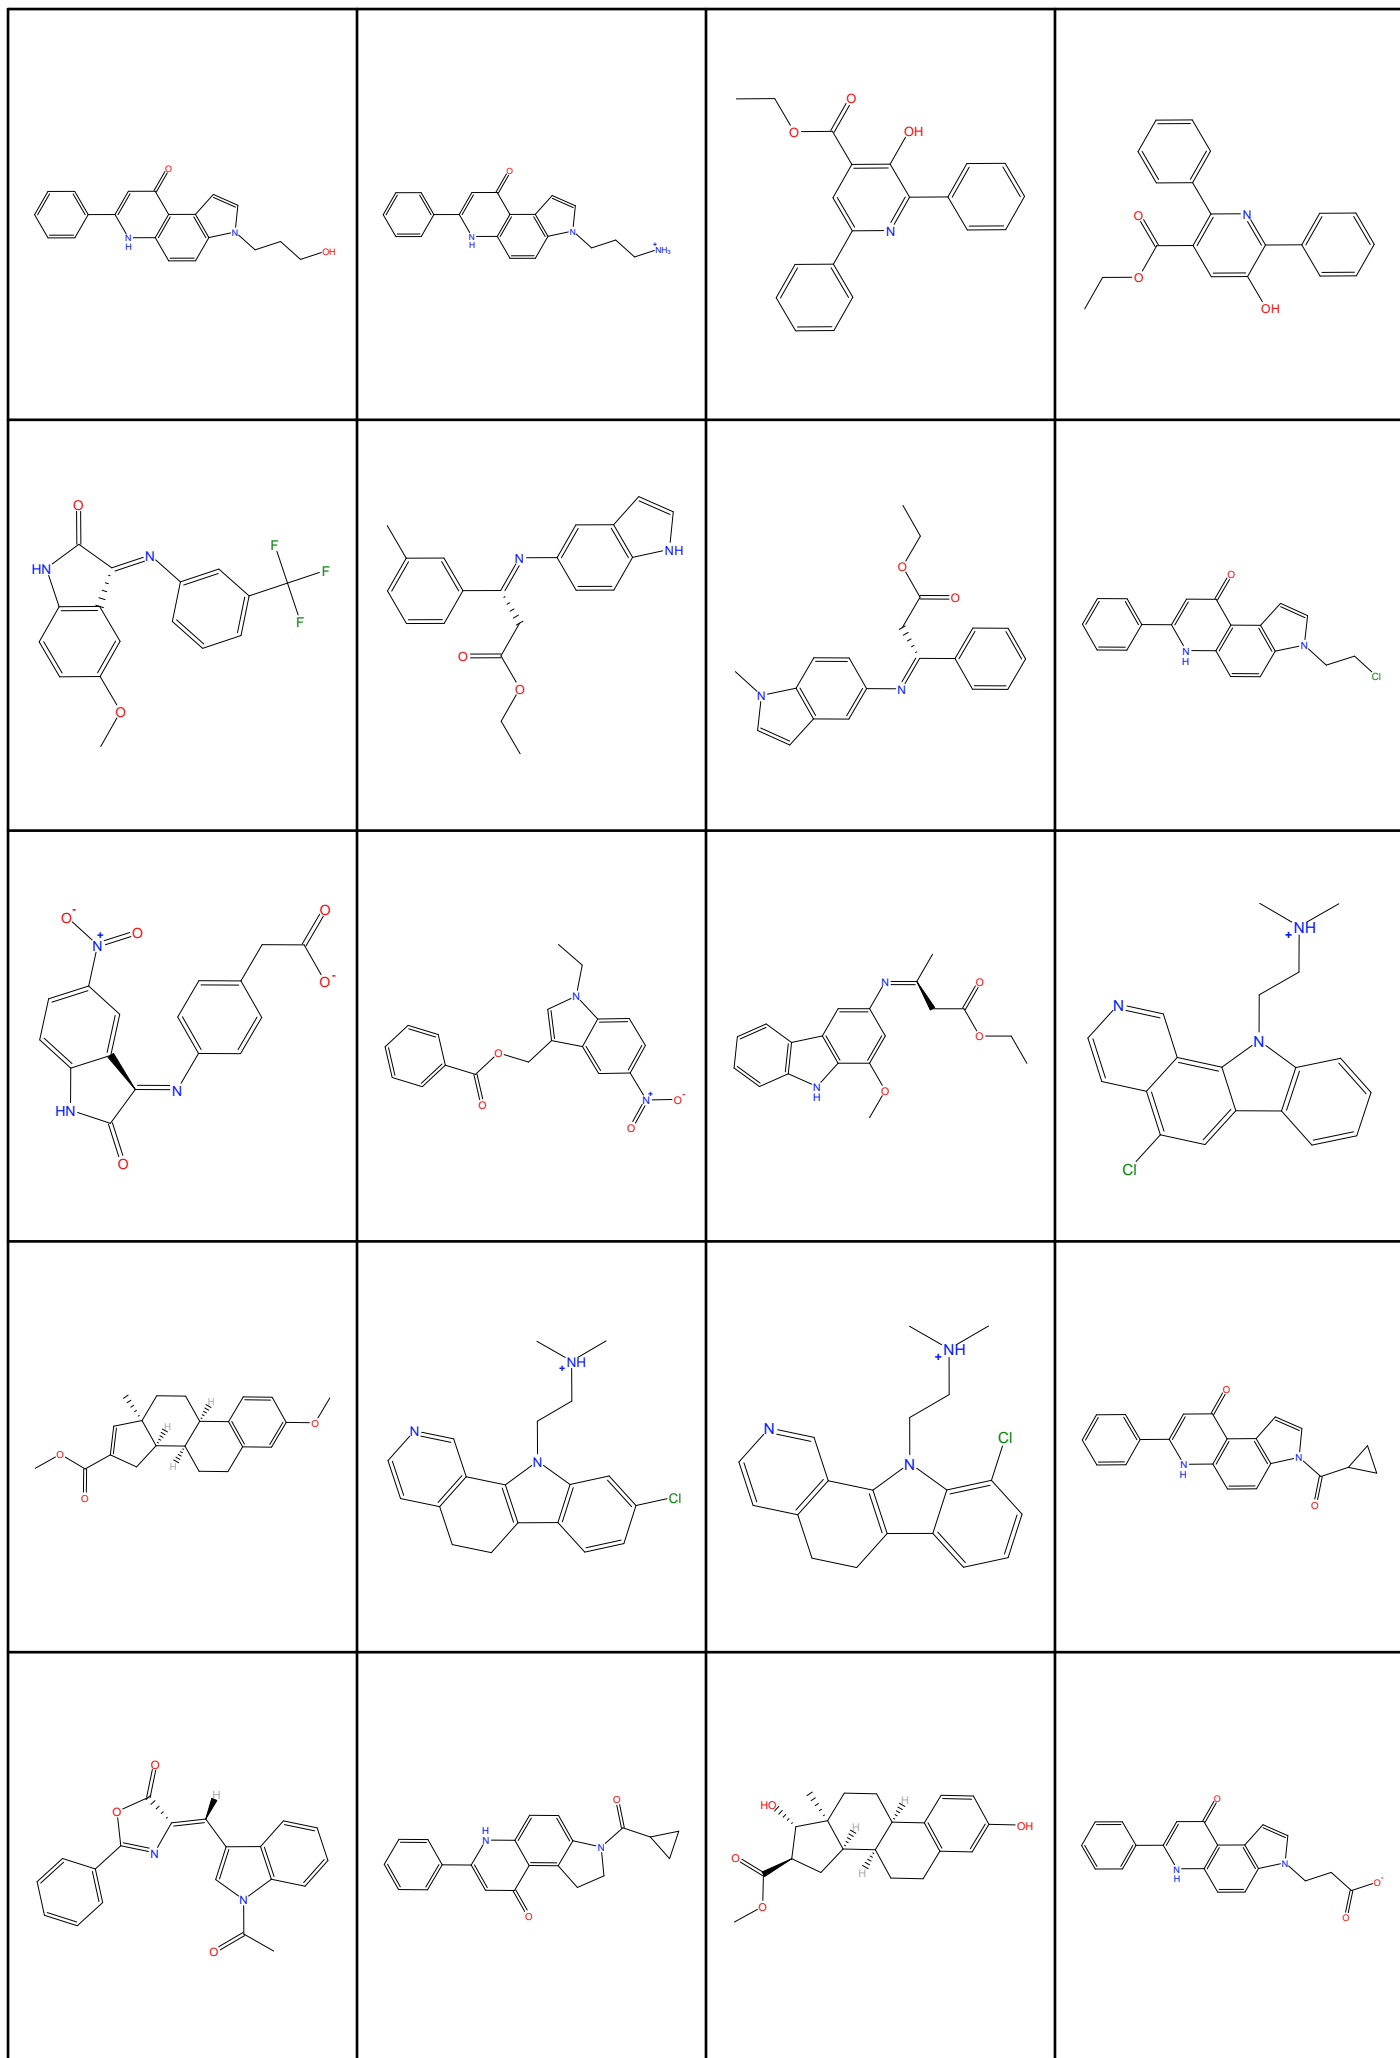

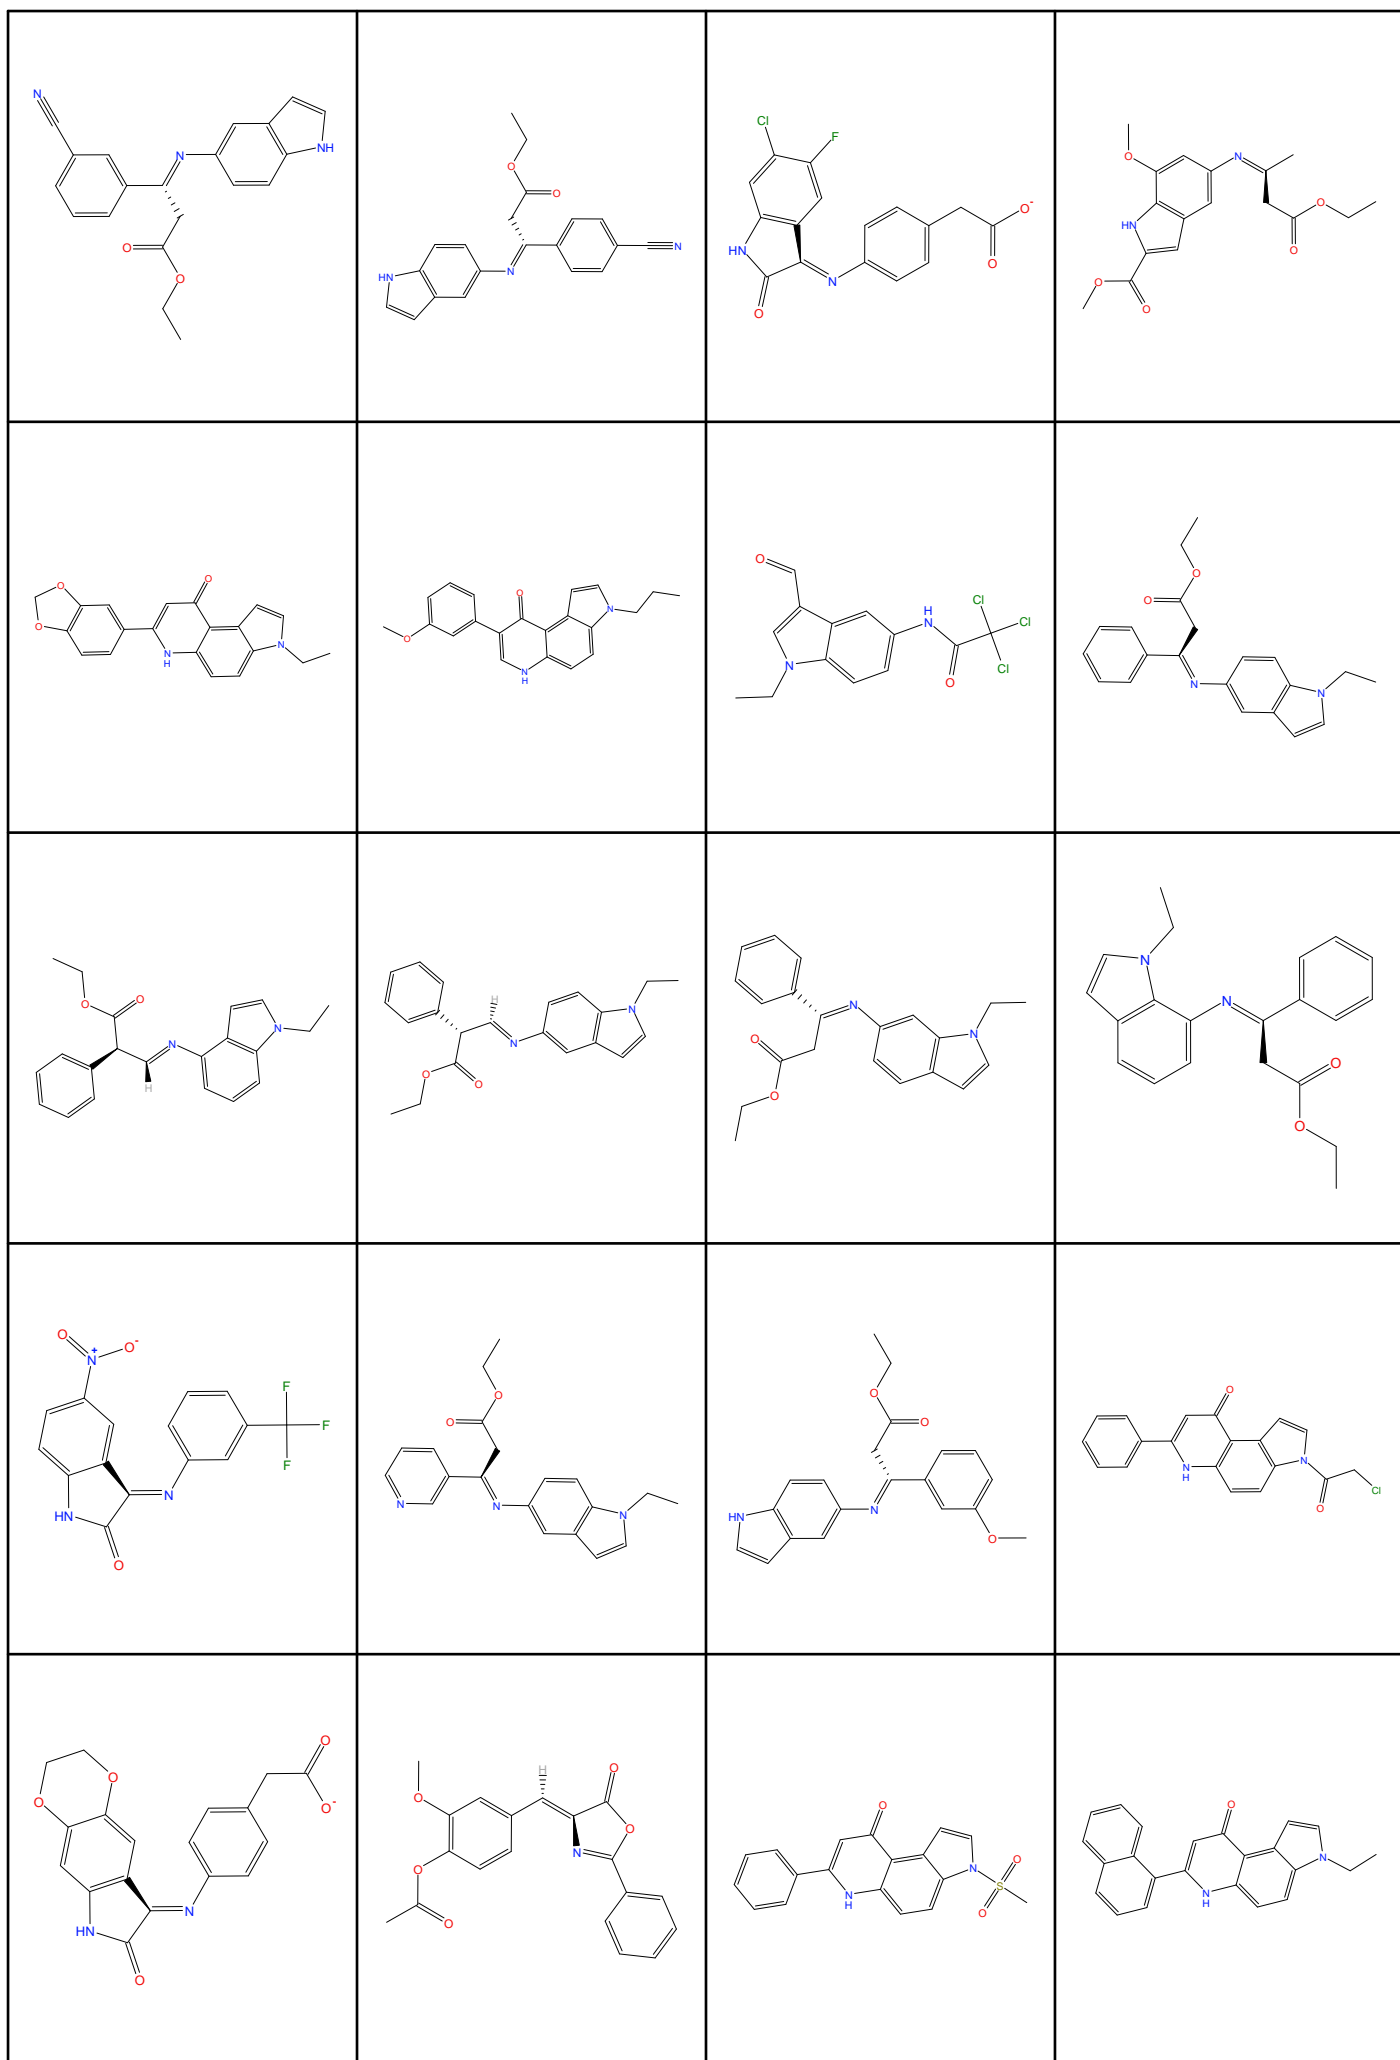

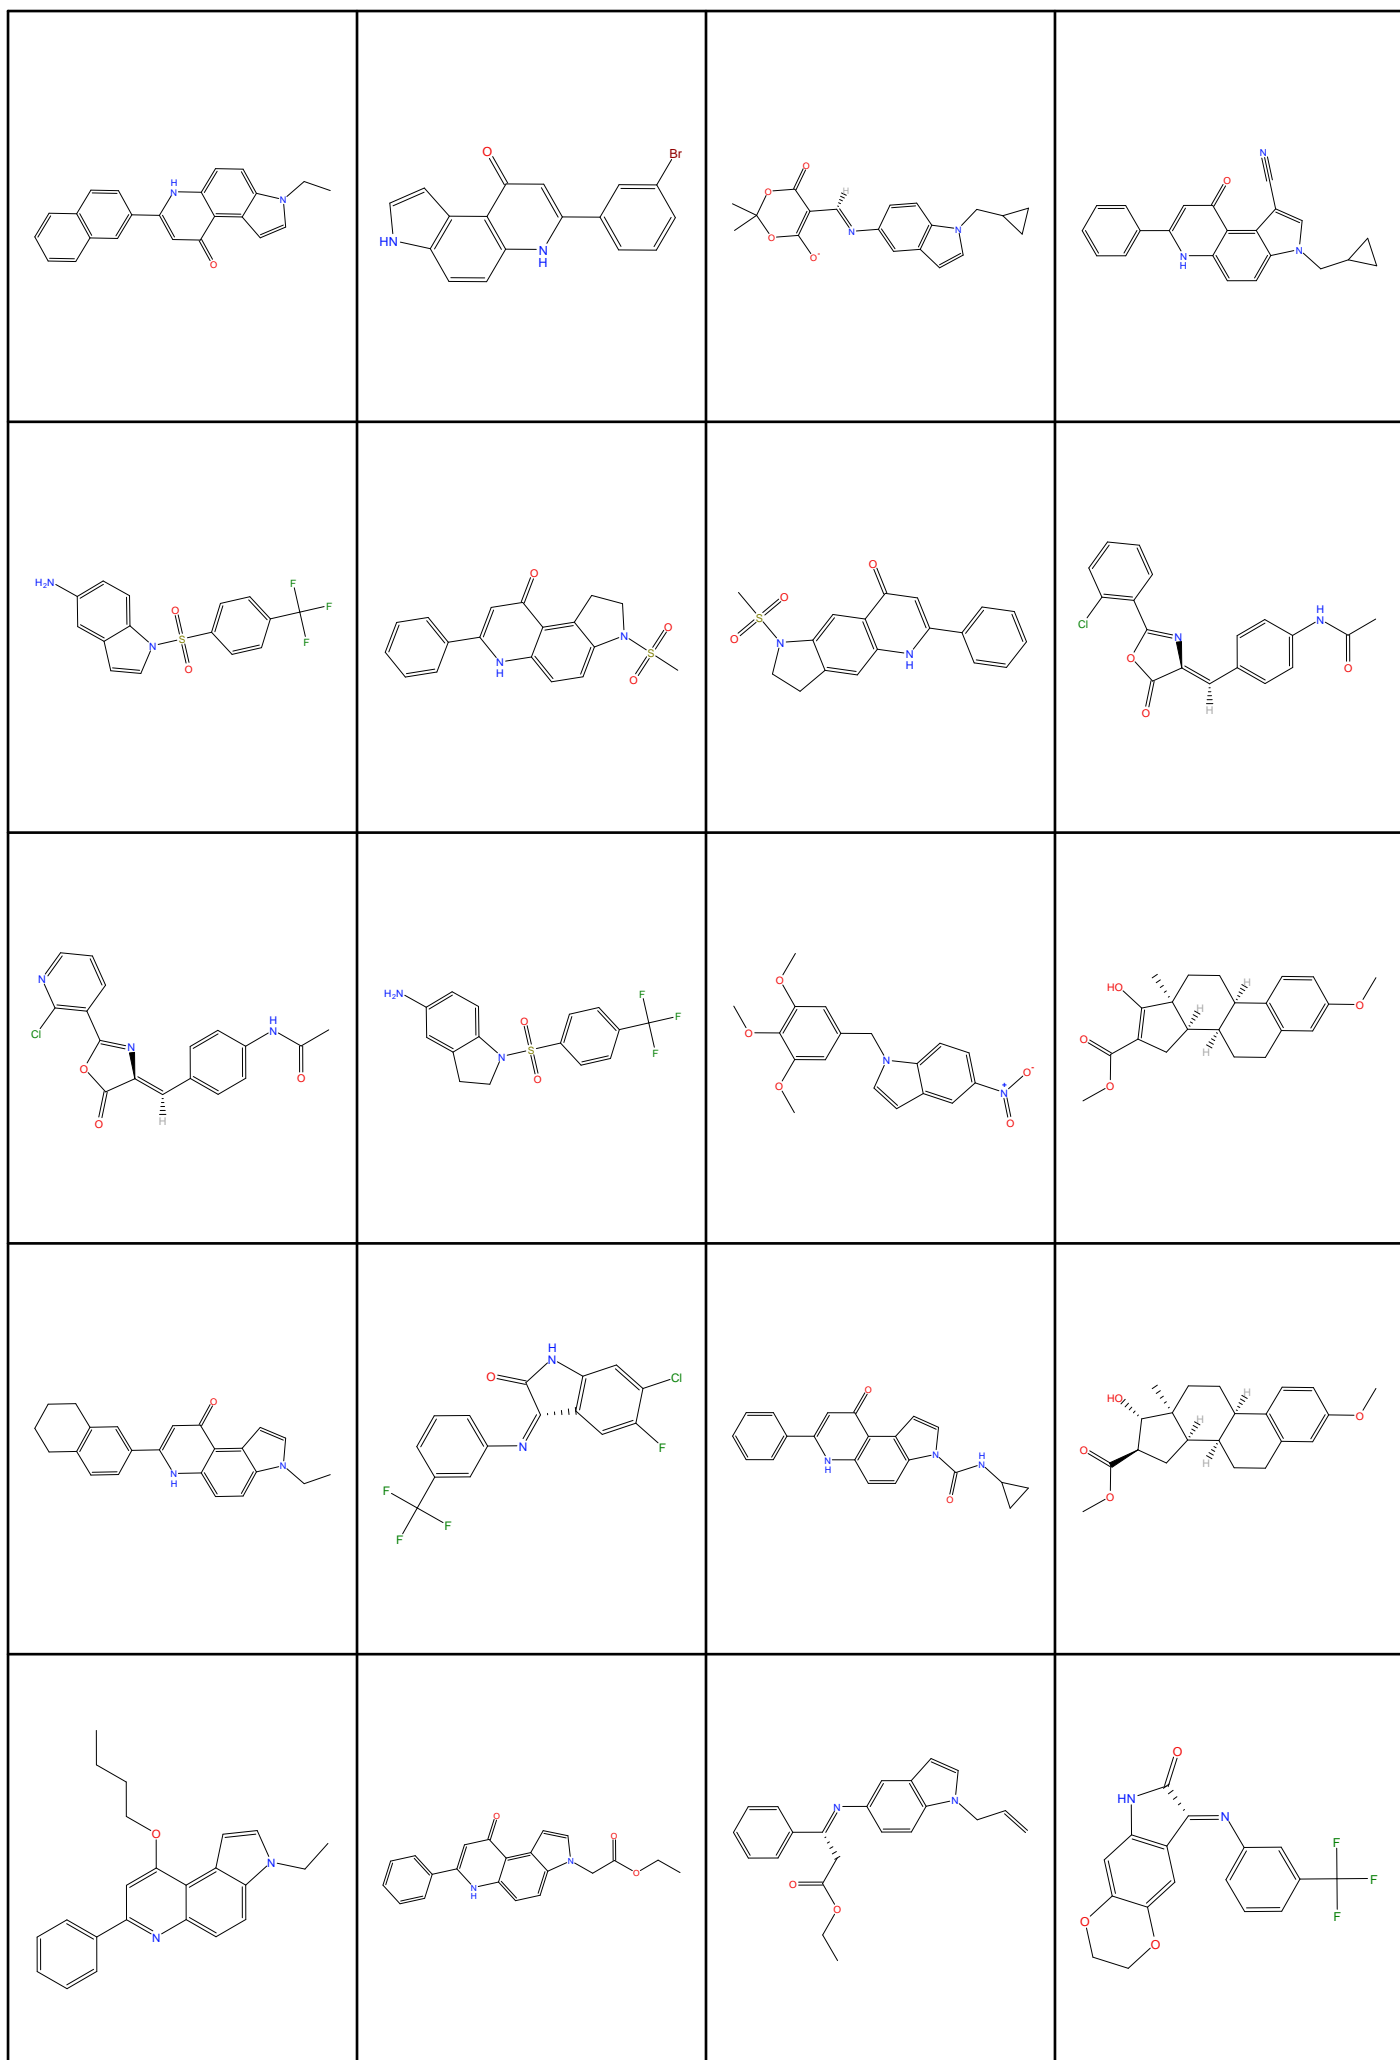



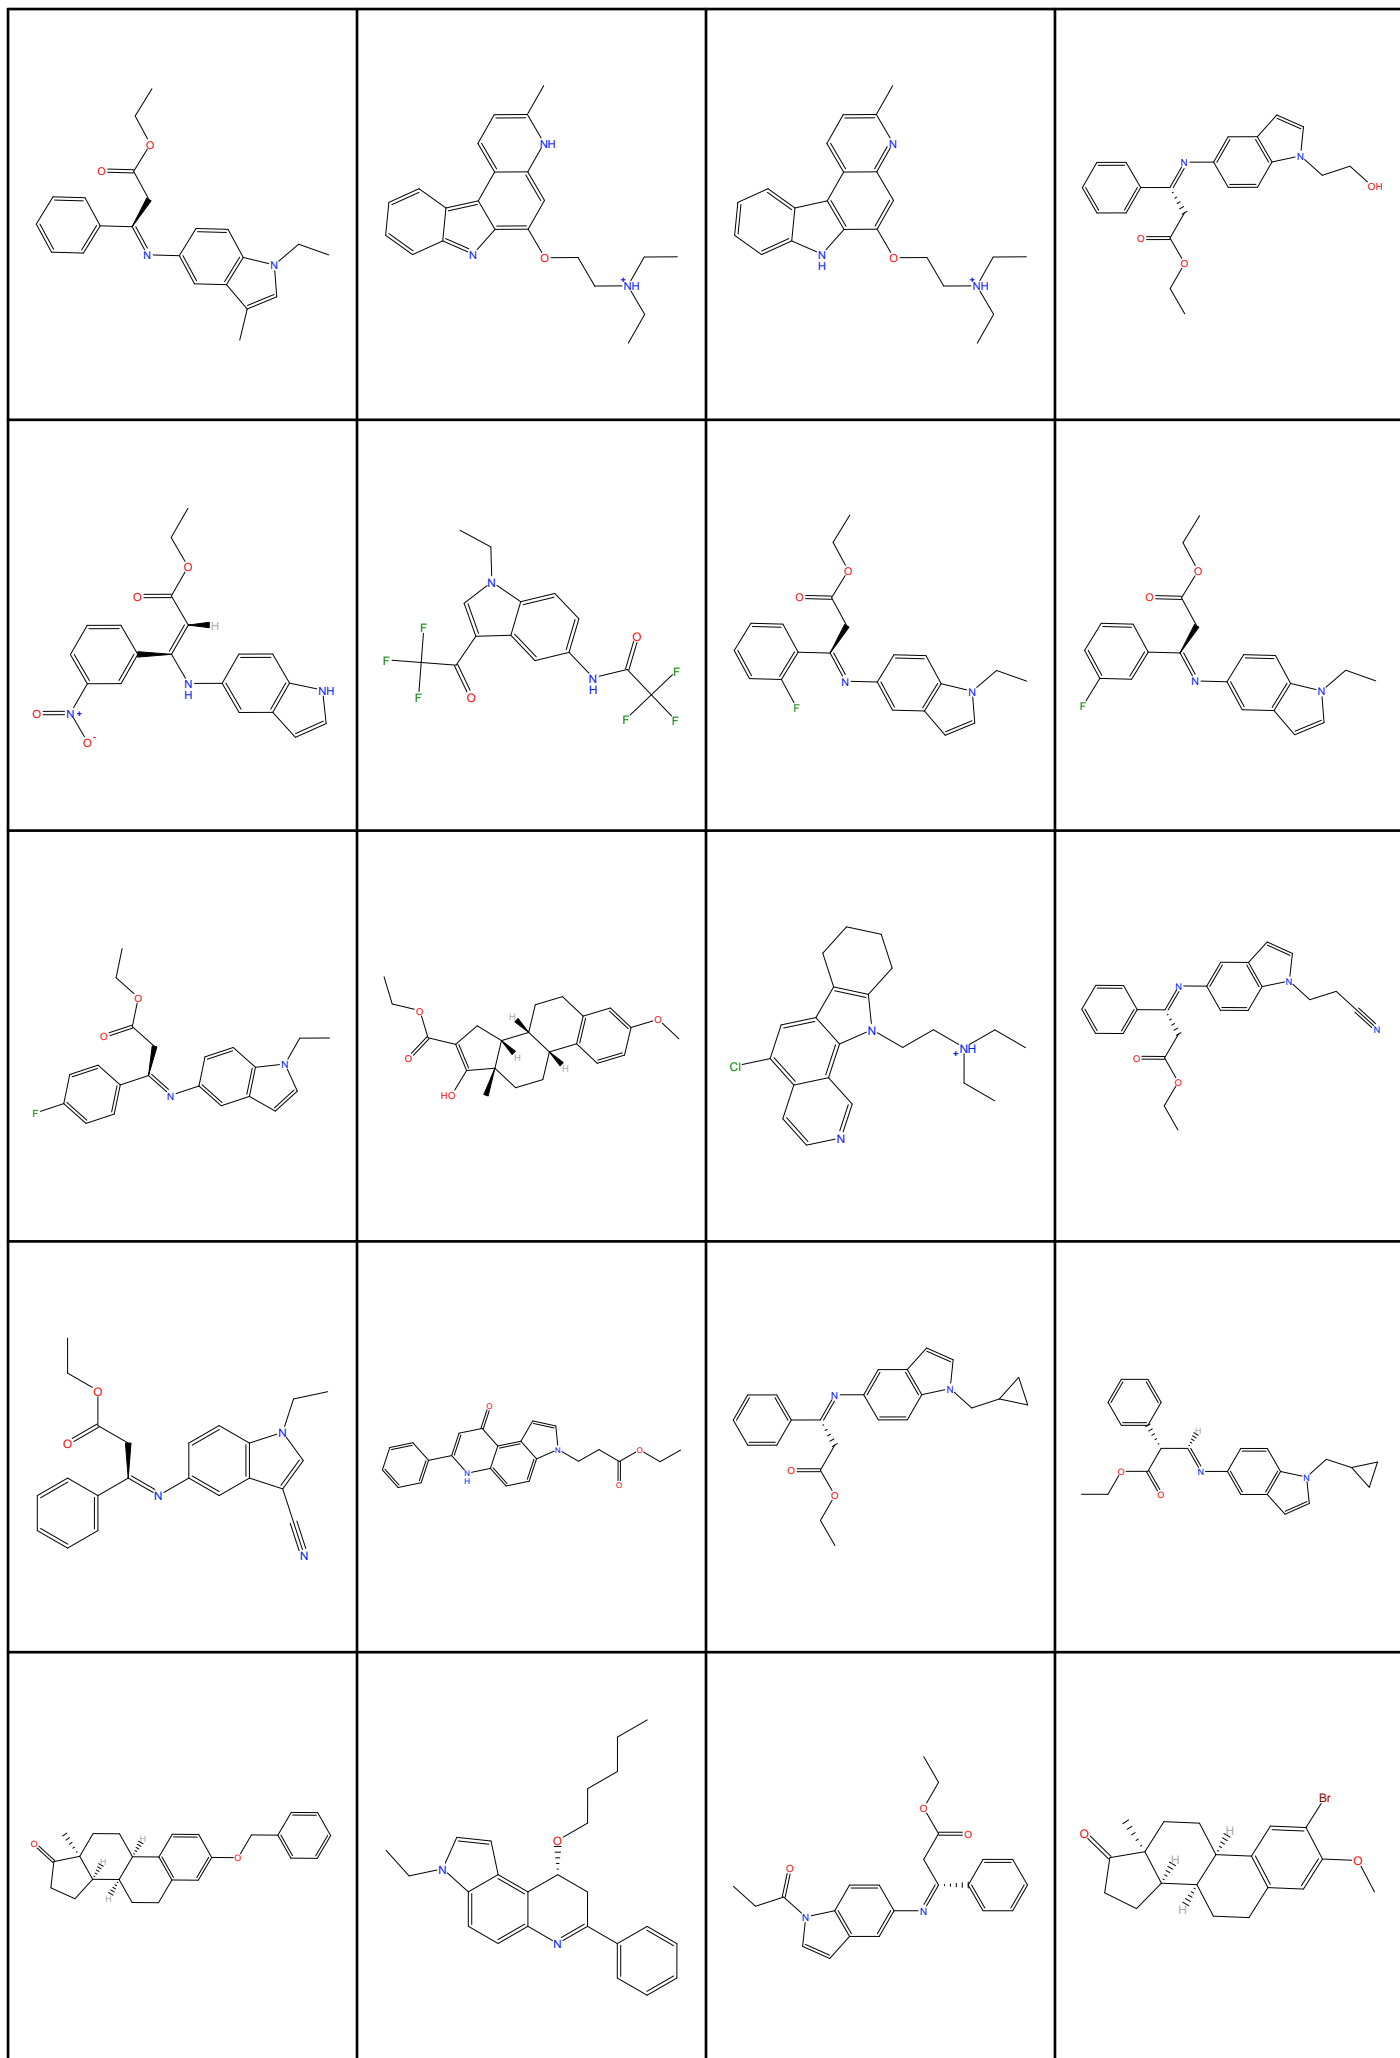

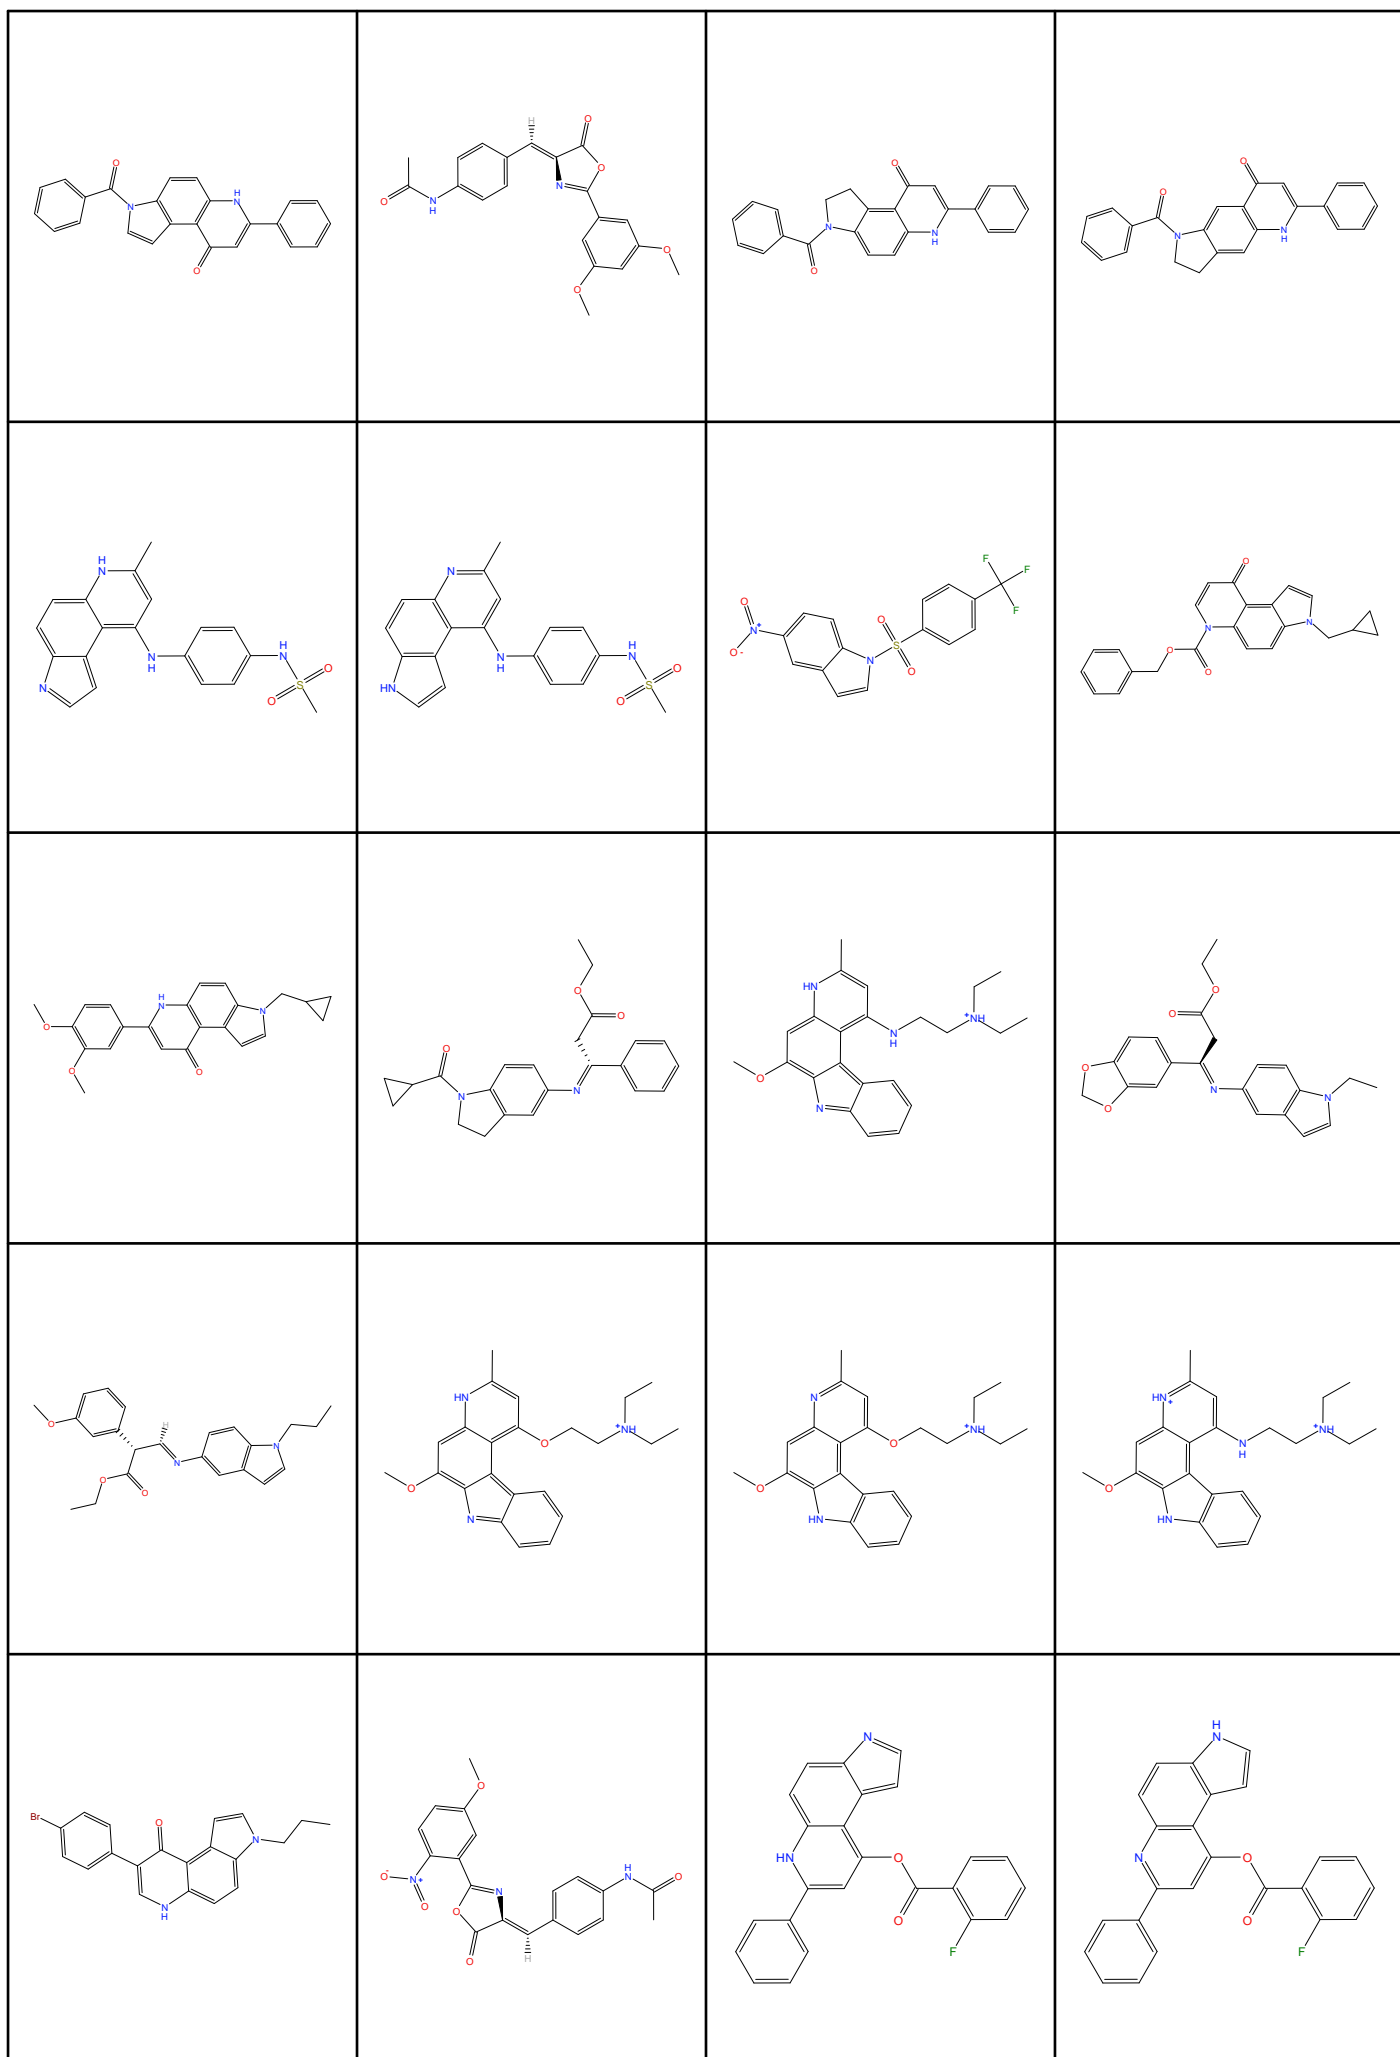

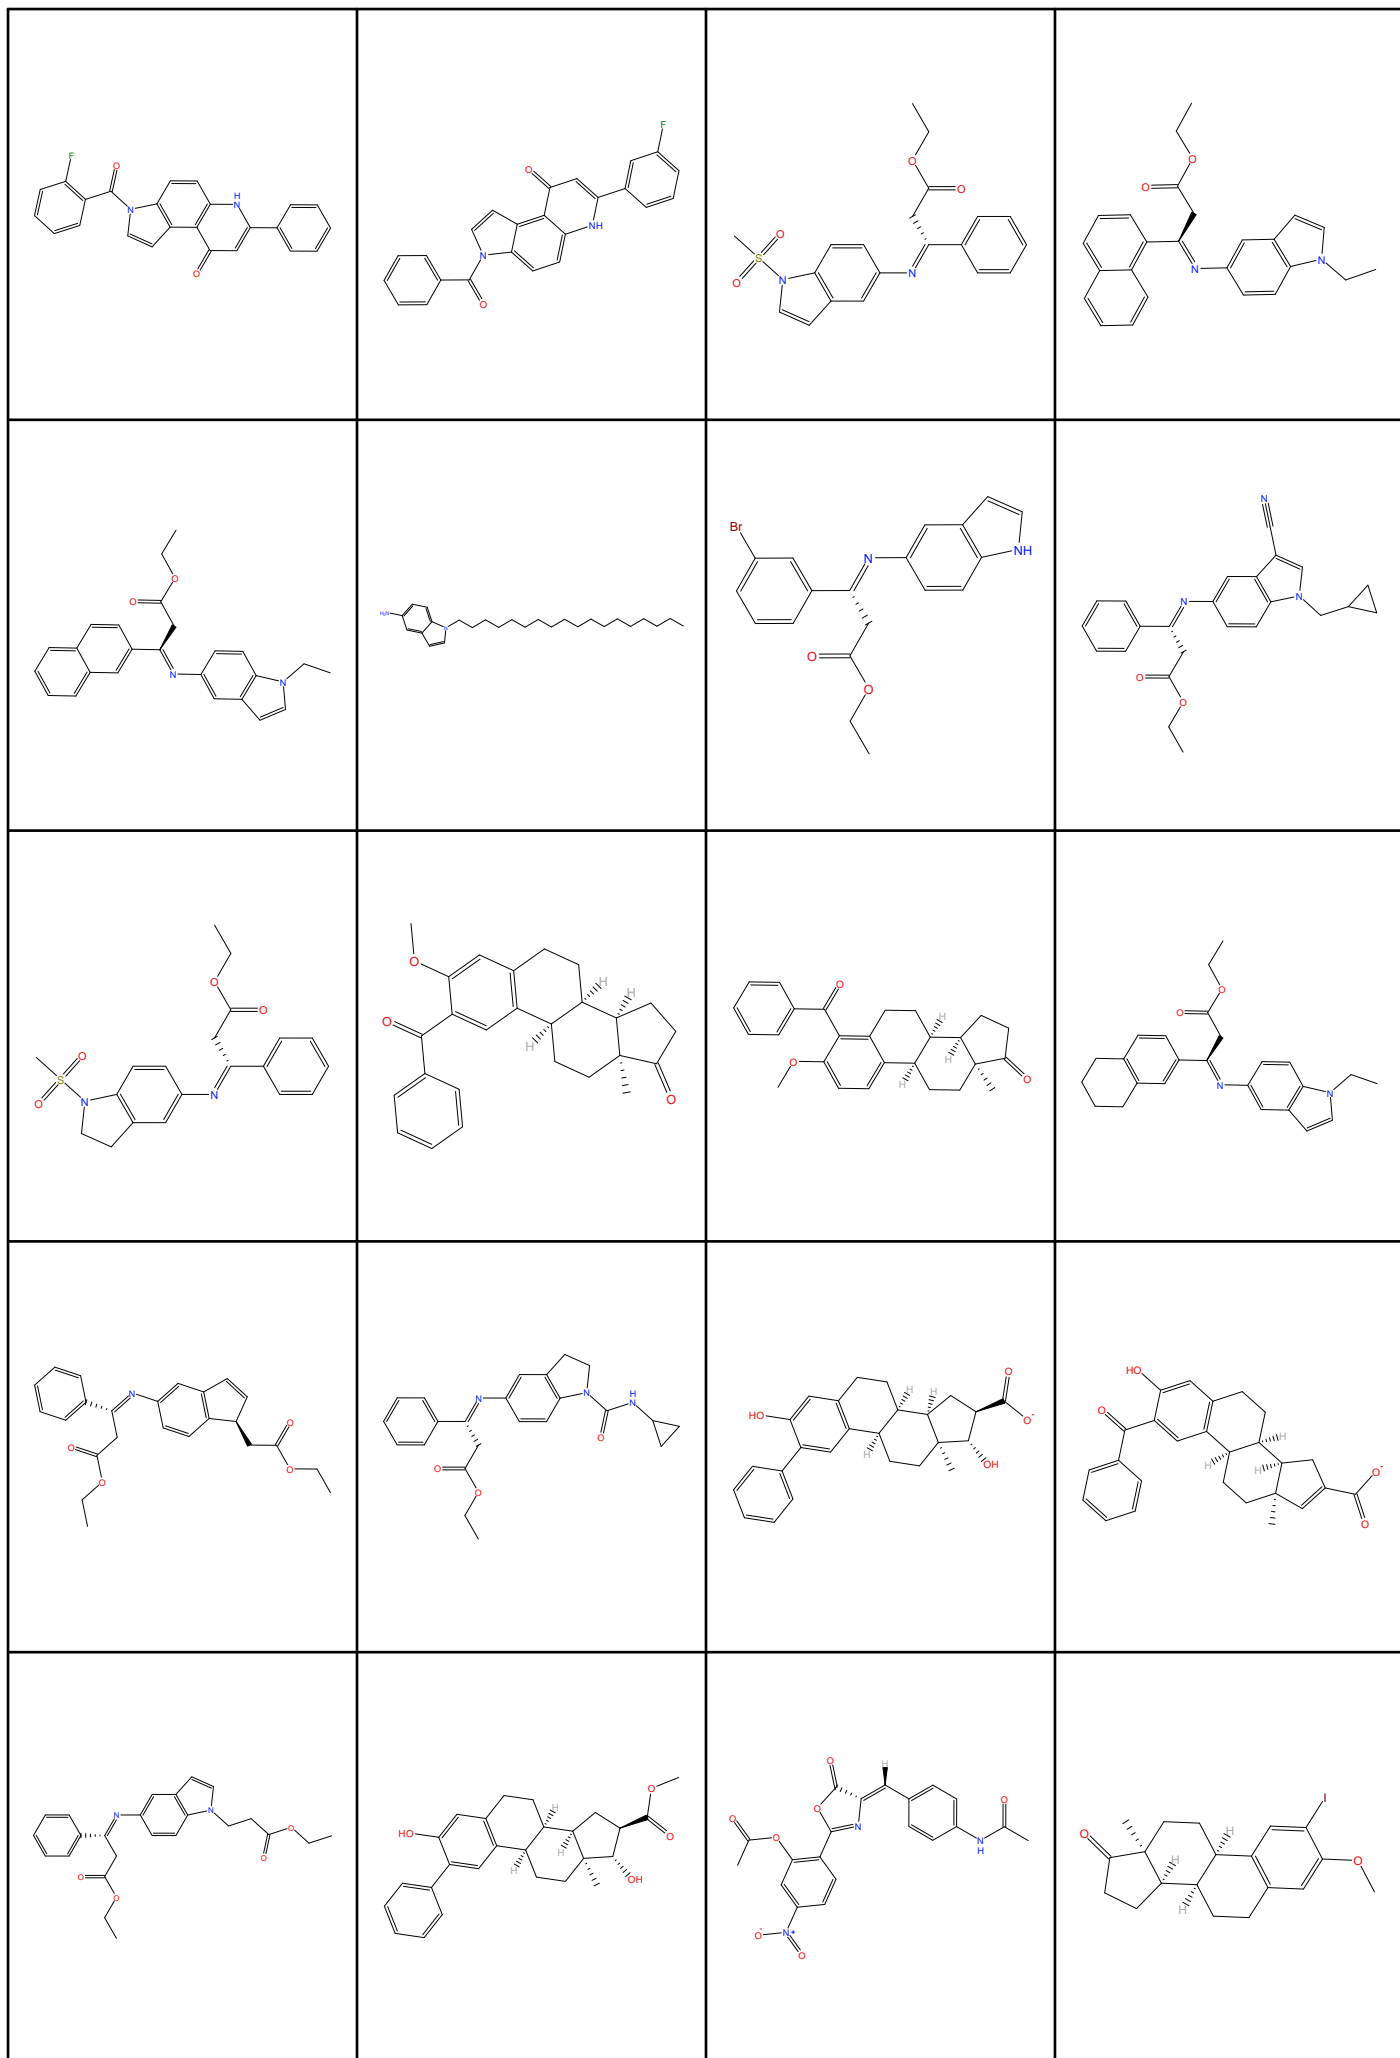

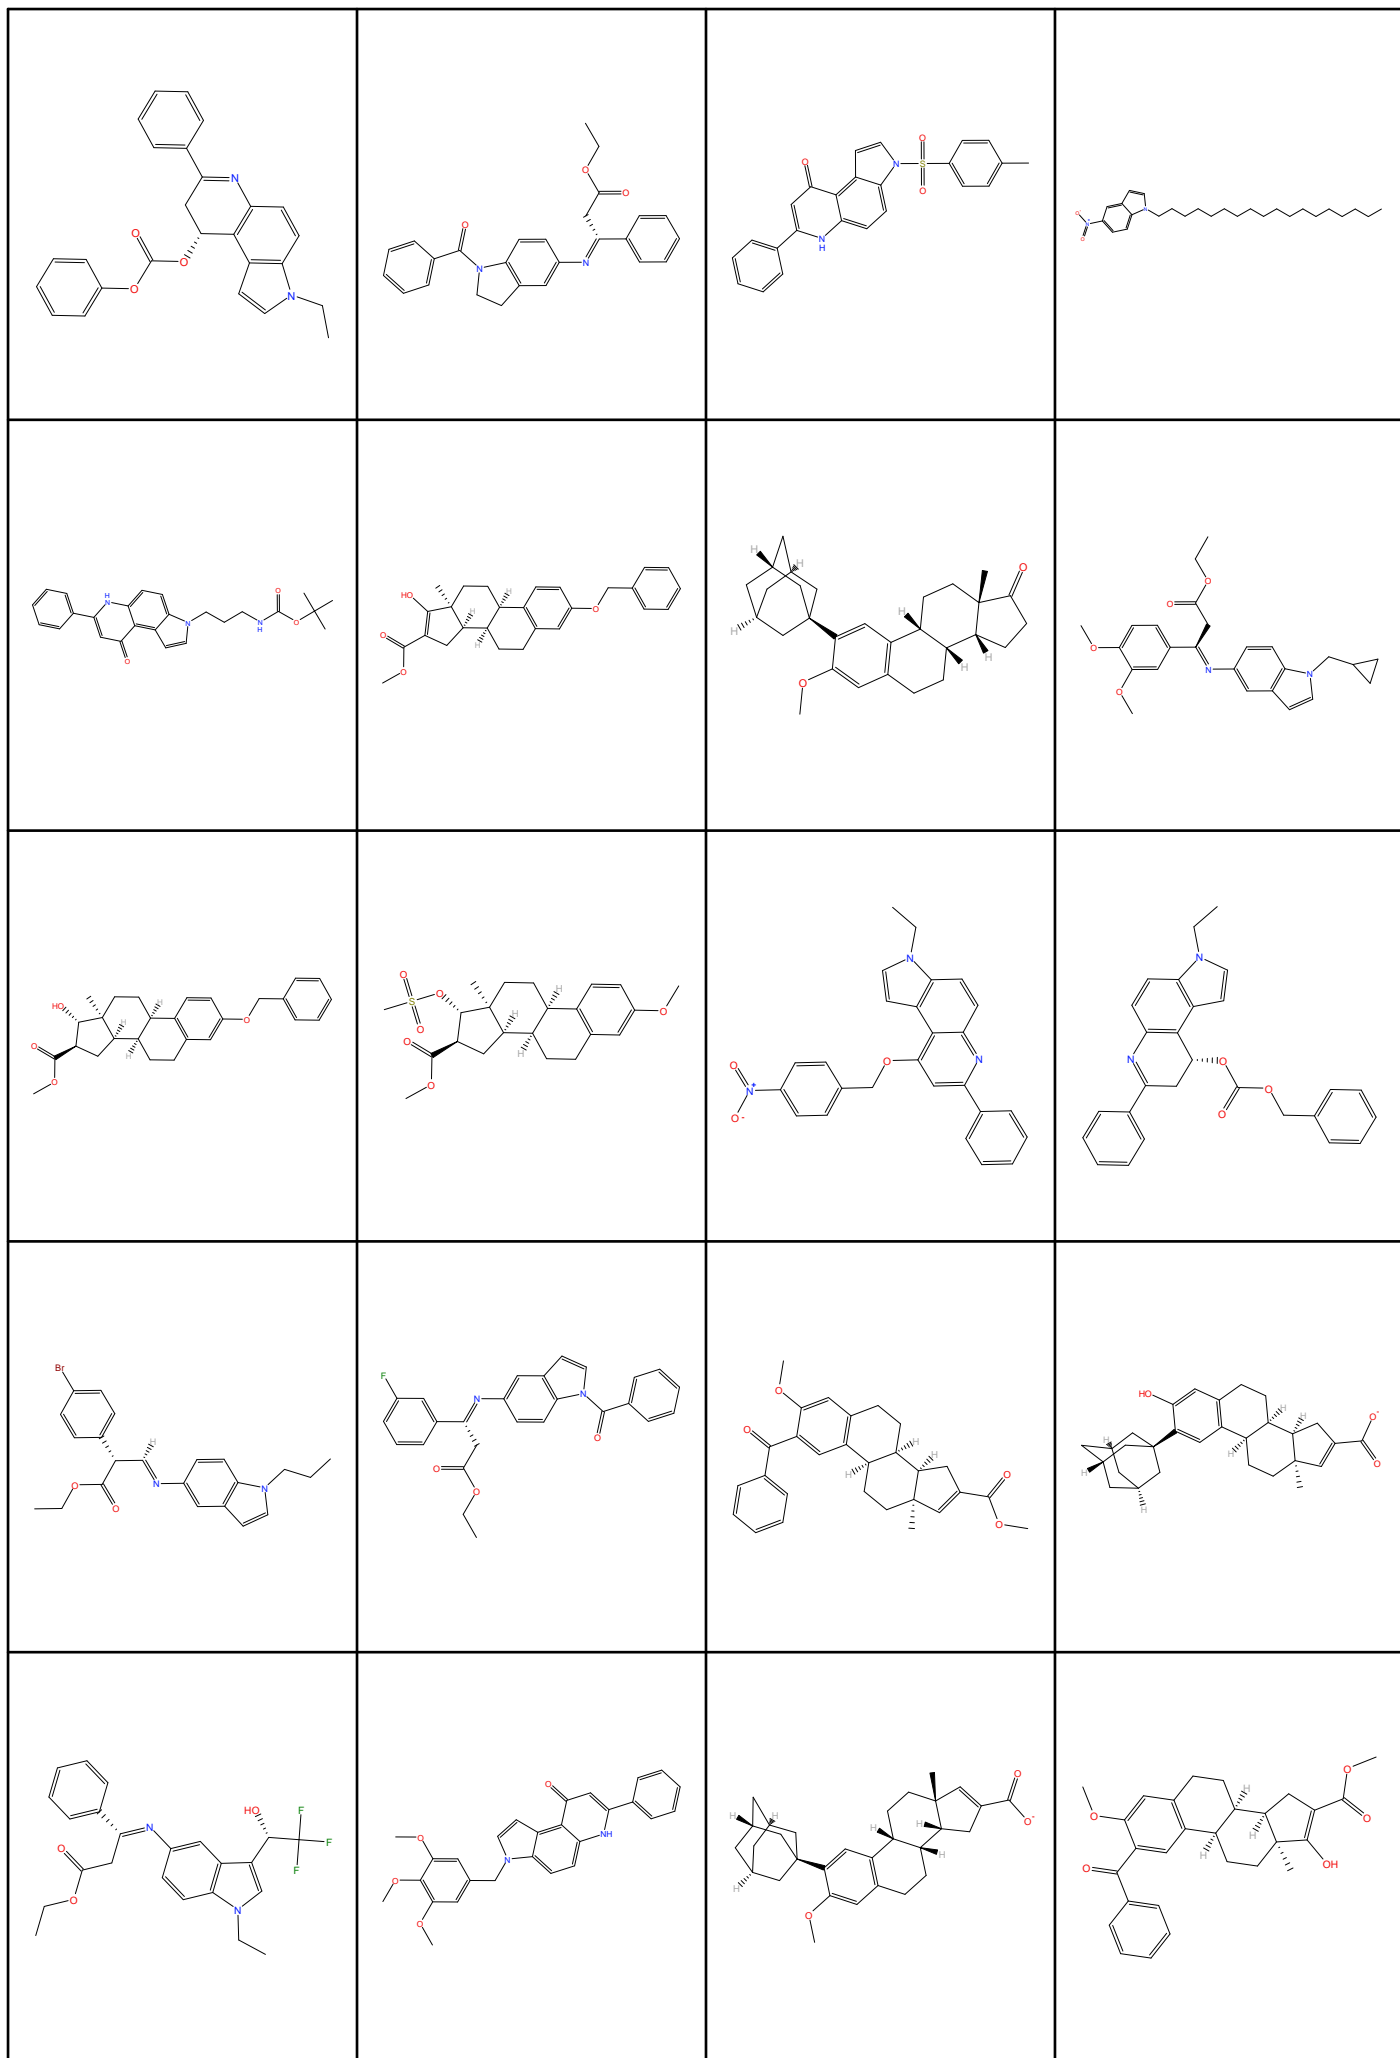

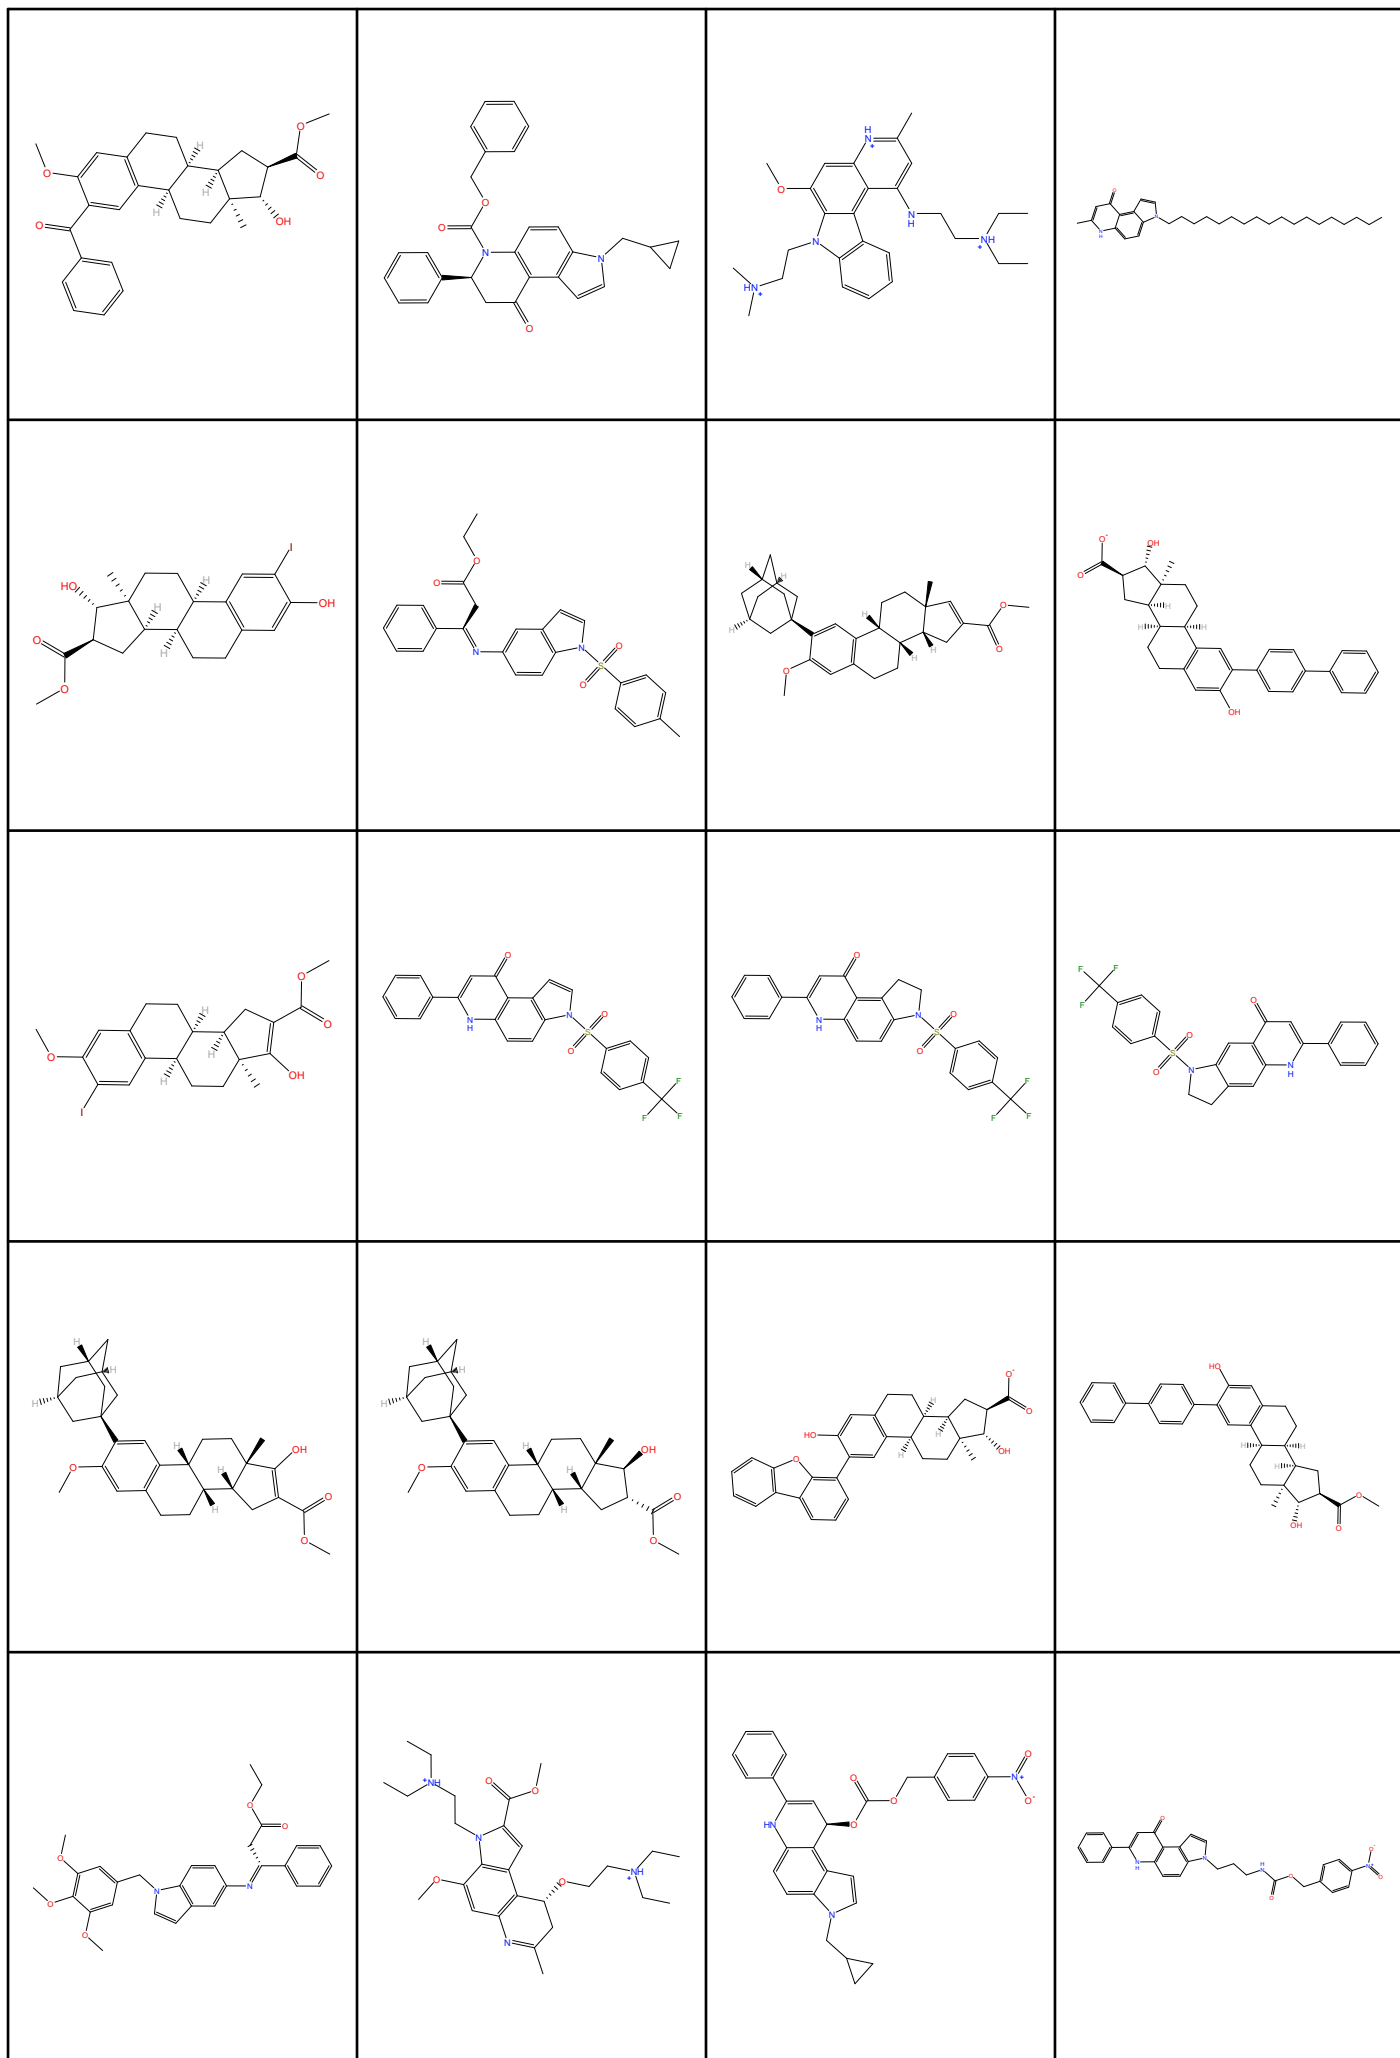

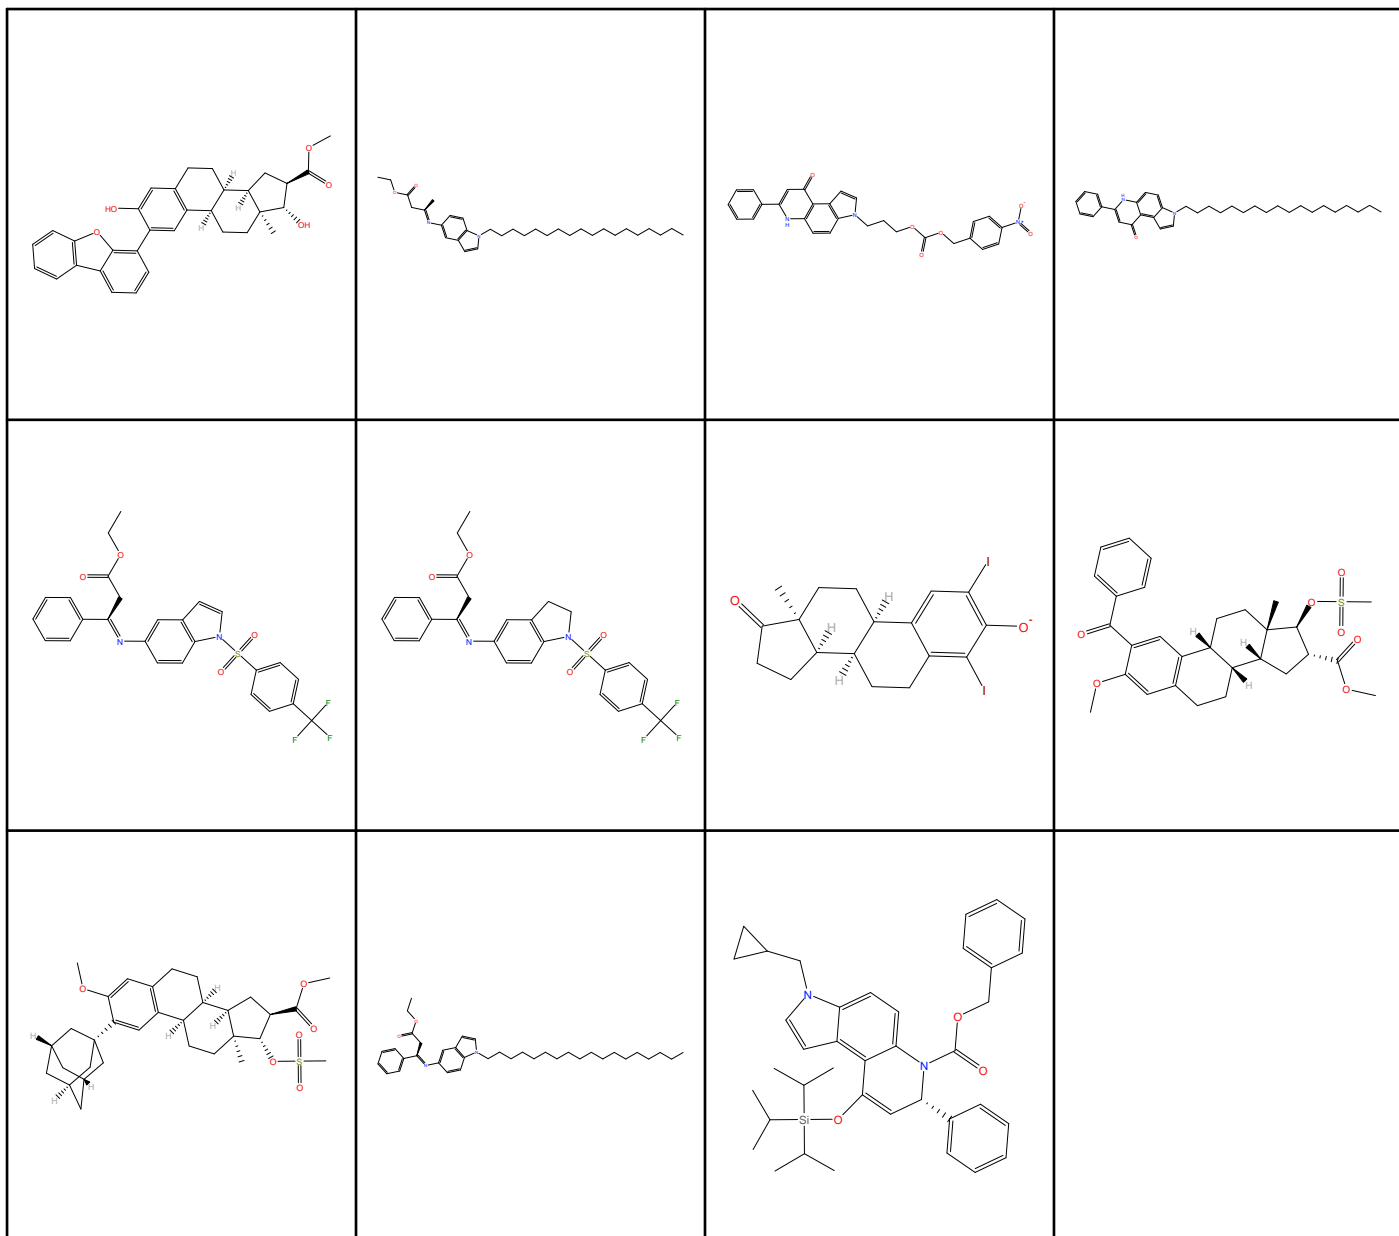

Supplement: ml0c00028_si_002.pdf [file ml0c00028_si_002.pdf]
