# Supplementary material
Source: PubMed Central journal article supplement (PMC7294733)

# Scaffold repurposing of in-house chemical library toward the identification of new Casein kinase 1 $\delta$ inhibitors.

*Eleonora Cescon<sup>[a,b]</sup>, Giovanni Bolcato<sup>[a]</sup>, Stephanie Federico<sup>[b]</sup>, Maicol Bissaro<sup>[a]</sup>, Alice Valentini<sup>[a]</sup>, Maria Grazia Ferlin<sup>[a]</sup>, Gianpiero Spalluto<sup>[b]</sup>, Mattia Sturlese<sup>[a]</sup>, Stefano Moro<sup>[a]\*</sup>*

## AUTHOR ADDRESS

[a] Department of Pharmaceutical and Pharmacological Sciences, University of Padova, via Marzolo 5, 35131 Padova, Italy

[b] Department of Chemical and Pharmaceutical Sciences, University of Trieste, Piazzale Europa, 1 34127 Trieste, Italia

**Figure 1.** The plot displays the comparison of the electrostatic contributions to the interaction energy of OCK (3UZP ligand) and Compound 1.

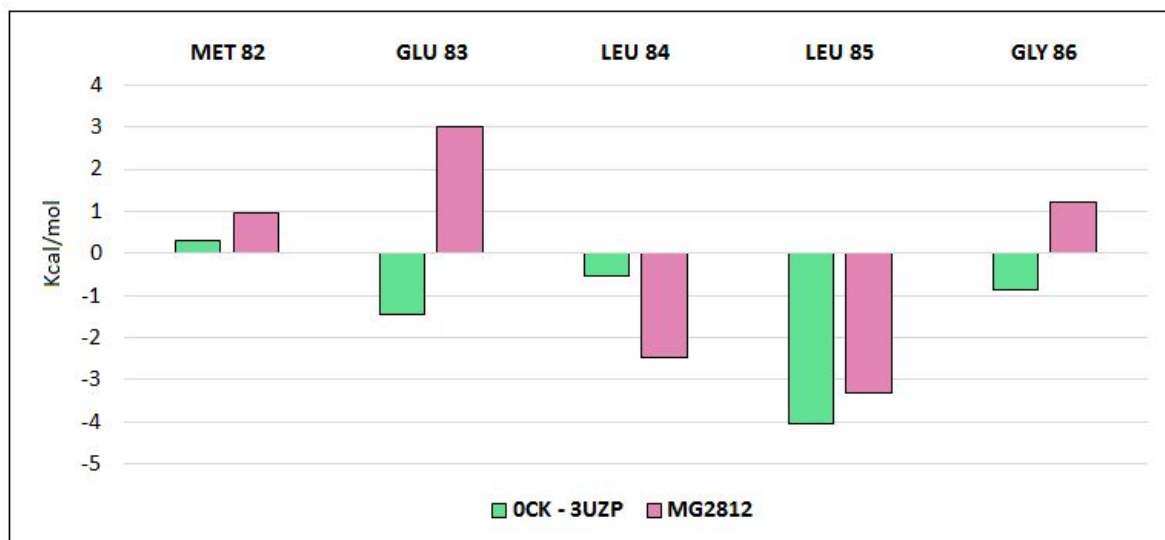

**Figure 2.** The plot displays the comparison of the electrostatic contributions to the interaction energy of OCK (3UZP ligand) and Compound 2.

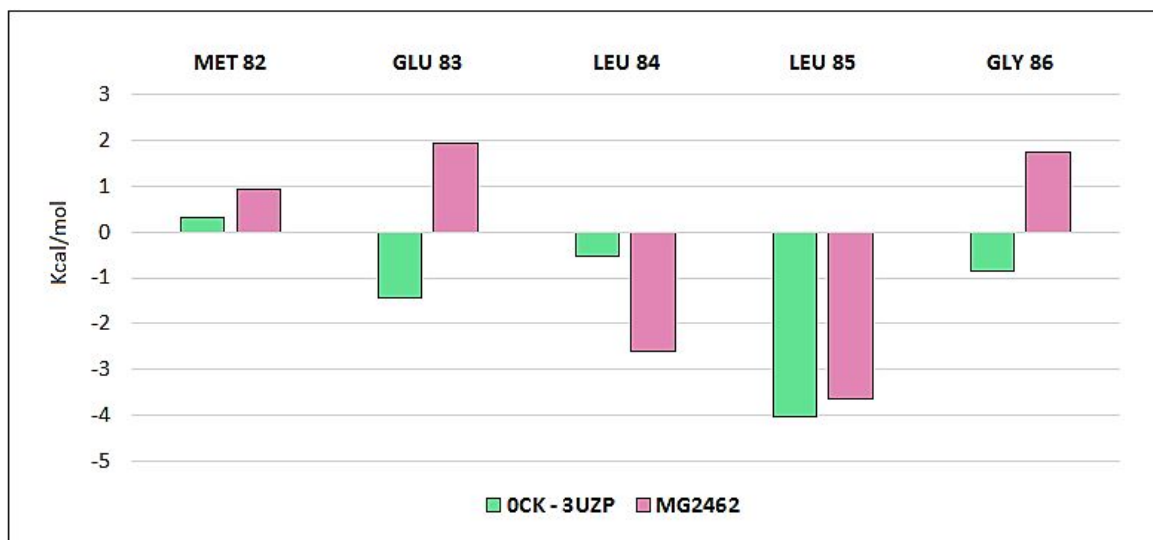

**Figure 3.** Concentration–inhibition curve of Compound 1 at human CK1δ. Data were collected from three independent experiments performed in duplicate.

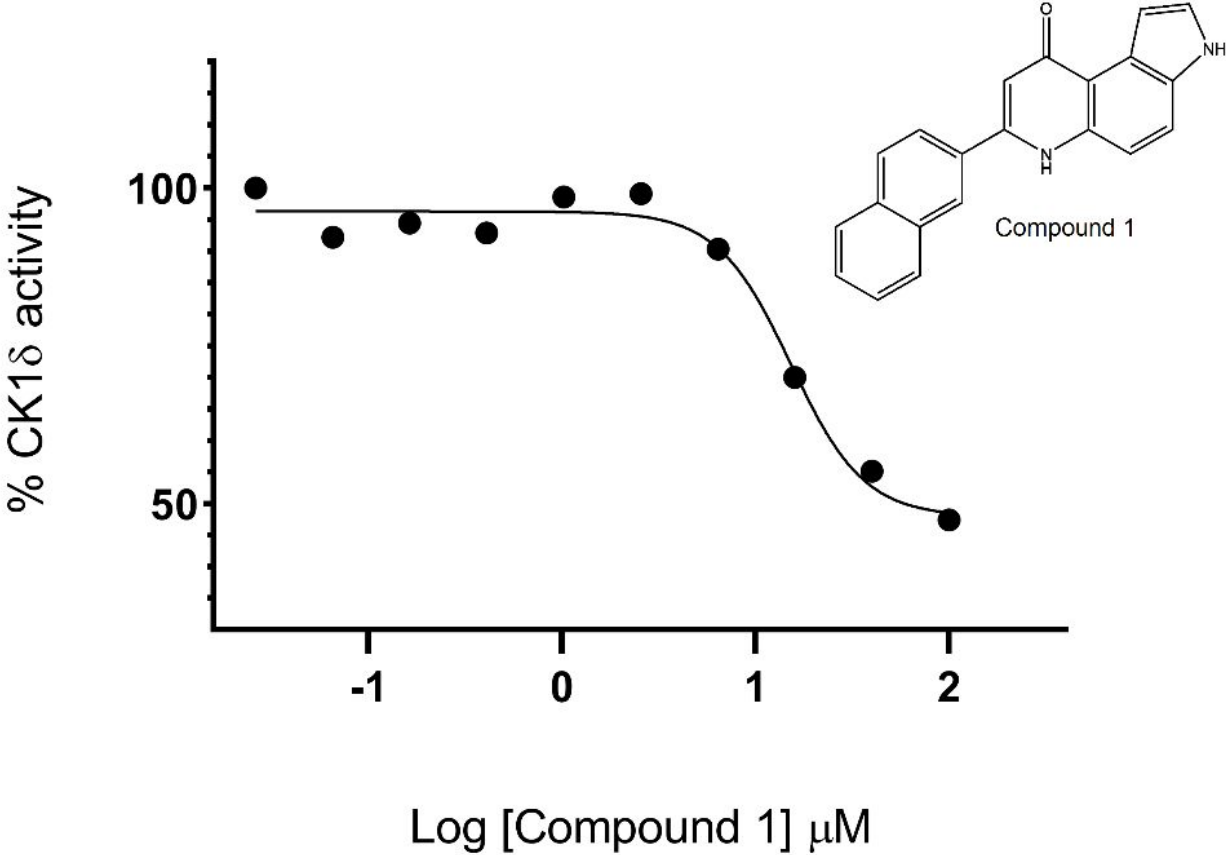

**Figure 4.** Concentration–inhibition curve of Compound 2 at human CK1δ. Data were collected from three independent experiments performed in duplicate.

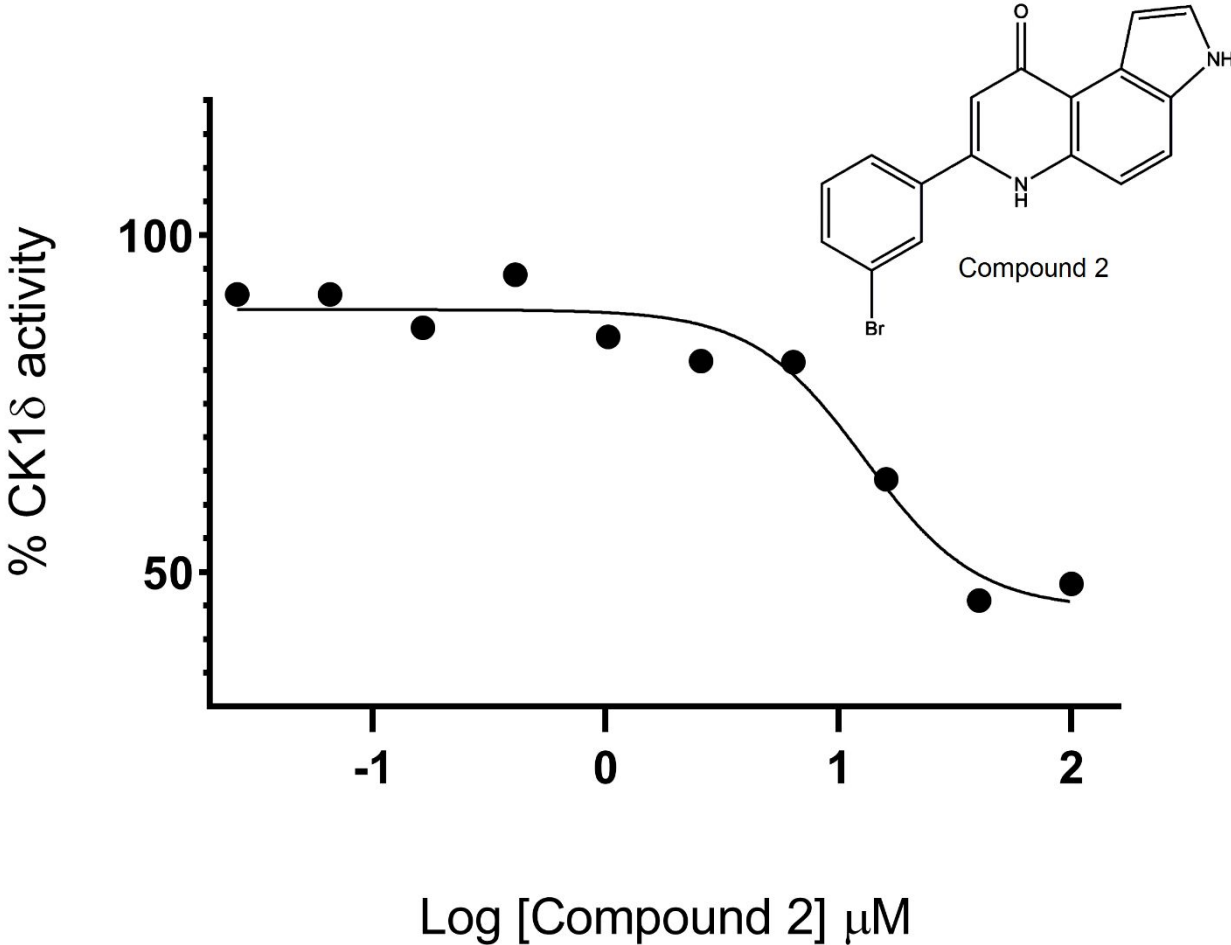

Supplement: ml0c00028_si_001.pdf [file ml0c00028_si_001.pdf]
